# Supplementary material
Source: PubMed Central journal article supplement (PMC6481166)
Supplement: NIHMS1517590-supplement-Supplement1.pdf [file NIHMS1517590-supplement-Supplement1.pdf]

## Supplementary Appendix

This appendix has been provided by the authors to give readers additional information about their work.

Supplement to: Splinter K, Adams DR, Bacino CA, et al. Effect of genetic diagnosis on patients with previously undiagnosed disease. *N Engl J Med* 2018;379:2131-9. DOI: 10.1056/NEJMoa1714458

# Effect of genetic diagnosis on patients with previously undiagnosed disease

## Supplementary information

|                                                                                                         |    |
|---------------------------------------------------------------------------------------------------------|----|
| <b>Methods</b>                                                                                          | 2  |
| Exome sequencing                                                                                        | 2  |
| Genome sequencing                                                                                       | 3  |
| Metabolomics                                                                                            | 4  |
| Central biorepository                                                                                   | 5  |
| Environmental exposure                                                                                  | 5  |
| Model Organisms Screening Center                                                                        | 5  |
| Bioinformatic analysis of genes and variants submitted to the MOSC                                      | 5  |
| Experimental work in the Drosophila and Zebrafish Cores                                                 | 6  |
| Data sharing                                                                                            | 7  |
| Sociology study                                                                                         | 8  |
| Participant engagement                                                                                  | 8  |
| Patient reported outcomes                                                                               | 8  |
| <b>Results</b>                                                                                          | 8  |
| Metabolomics                                                                                            | 8  |
| Analysis of NR5A1 Overexpression and the Effects of the R92W Mutation                                   | 8  |
| <b>References</b>                                                                                       | 9  |
| <b>Figure S1. Applicant geographic distribution</b>                                                     | 11 |
| <b>Figure S2. Participant page</b>                                                                      | 12 |
| <b>Figure S3. Metabolomic data suggesting 3-hydroxy-3-methylglutaryl-CoA lyase deficiency diagnosis</b> | 13 |
| <b>Table S1. Applicants not accepted for evaluation</b>                                                 | 14 |
| <b>Table S2. UDN diagnoses and clinical actions</b>                                                     | 15 |
| <b>Table S3. Details of UDN evaluation</b>                                                              | 29 |
| <b>Table S4. Applicant demographic characteristics and primary symptom category</b>                     | 45 |
| <b>Contributions</b>                                                                                    | 48 |
| <b>Members of the Undiagnosed Diseases Network</b>                                                      | 49 |

## Methods

Seven clinical sites participate in the UDN. They include Baylor College of Medicine, Duke University School of Medicine, Harvard Medical School Teaching Hospitals (Boston Children's Hospital, Brigham and Women's Hospital, and Massachusetts General Hospital), National Institutes of Health Clinical Center, Stanford Medical Center, David Geffen School of Medicine at the University of California Los Angeles, and Vanderbilt University Medical Center.

Applications are accepted from patients located anywhere in the world. A study recommendation letter from a healthcare provider is required for the case to be considered. Cases are distributed by the coordinating center according to an algorithm developed by the UDN steering committee that is based on the patient's geographical location. The clinical site reviews the study recommendation letter and requests medical records detailing prior evaluations and testing. Cases are proposed for acceptance by the network at a biweekly interactive conference call. Individual clinical sites carry out clinical investigation of the patient. Some patients are admitted to hospitals affiliated with the clinical sites to expedite investigation.

All patients are eligible for exome or genome sequencing and for metabolomics analysis. The decision as to which tests are used is made by the clinical site. If prior workup includes genomic sequencing or metabolic screens, these data may be reviewed by the site at their discretion. Additionally, at the discretion of the clinical sites, exome or genome sequencing may be employed prior to the clinical evaluation of a patient.

### Exome sequencing

Peripheral blood or extracted DNA is collected from patients and available family members. Samples are submitted from each clinical site to the Baylor Clinical Laboratory following informed consent. Patient clinical data are available through the UDN Gateway. Exome sequencing protocols, including library construction, exome capture by VCRome version 2.1, HiSeq next generation sequencing (NGS), and data analysis, are as previously described.<sup>13</sup> Interpretation and review are facilitated by internal annotation databases, a central in-house tracking system of all cases, and increasing automation.

For the paired-end pre-capture library procedure of the exome sequencing, genome DNA is fragmented by sonicating genomic DNA and ligating to the Illumina multiplexing PE adapters. The adapter-ligated DNA is then PCR amplified using primers with sequencing barcodes (indexes).<sup>1</sup> For target enrichment/exome capture procedure, the pre-capture library is enriched by hybridizing to biotin labeled VCRome 2.1 in-solution exome probes at 47°C for 64 - 72 hours.<sup>2,3</sup> Additional probes for over 3600 Mendelian disease genes were also included in the capture in order to improve the exome coverage. The post-capture library DNA is then subjected to sequence an analysis on Illumina HiSeq platform for 100 bp paired-end reads to achieve a mean coverage of >100X for target bases. As a quality control measure, the individual's DNA is also analyzed by a cSNP-array (Illumina HumanExome-12v1 array). The SNP data are compared with the exome data to ensure correct sample identification and to assess sequencing quality.

Data analysis and annotation were performed by the Mercury pipeline. The output data from Illumina HiSeq are converted from bcl file to FastQ file by Illumina CASAVA 1.8 software, and mapped by the BWA program to the reference haploid human genome sequence (Genome Reference Consortium human genome build 37, human genome 19).<sup>4</sup> The variant calls are performed using Atlas-SNP and Atlas-indel developed in-house by BCM HGSC. The variant annotations are performed using in-house developed software: HGSC-SNP-anno and HGSC-indel-anno. Variants with suboptimal quality scores were removed from consideration. Remaining variants were compared computationally to the list of reported mutations from the Human Gene Mutation Database (HGMD). HGMD variants with a minor allele frequency (MAF) of greater than 5% according to 1000 Genome Project (TGP) 18 or the Exome Aggregation Consortium (ExAC) were removed. For non-HGMD changes, synonymous variants, intronic variants more than 5 bp from exon boundaries which are unlikely to affect mRNA splicing, or common variants (MAF >1%) were also discarded.

For data interpretation, variants generated by the Mercury pipeline are analyzed according to ACMG guidelines and internal SOP<sup>5,6</sup> (references 5 and 6) based on existing information from public databases such as ClinVar, ExAC, the literature, and the internal knowledge base, as well as the patient phenotypes. The report contains results of variants, genes, and diseases related to the patient's clinical phenotype as well as medically actionable incidental findings (for minor and adult individuals) and carrier status (for adult individuals only) if consented. Variants on the report are confirmed by Sanger sequencing.

## **Genome sequencing**

Extracted DNA is collected from patients and available family members and submitted from each clinical site following informed consent to the HudsonAlpha Sequencing Laboratory. Patient clinical data are available through the UDN Gateway. Whole genome sequencing (WGS) protocols, including library construction and HiSeq X next generation sequencing (NGS), are performed as previously described. Analysis and interpretation are performed using an in-house developed tool (Codicem), which makes use of variant impact and genotype to phenotype association algorithms and datasets together with internal disease curations to support rapid efficient WGS data interpretation, including structural variants. Individual clinical sites also perform parallel analyses at their local institutions.

DNA was evaluated for concentration (Picogreen) and integrity (agarose gel). DNA with poor integrity or of low concentration was re-extracted or a replacement requested. Following library construction, each library was quality controlled prior to sequencing. For passing samples, genomic DNA was fragmented by sonication and subsequently ligated to the Illumina multiplexing PE adapters. The adapter-ligated DNA was then PCR amplified using primers with sequencing barcodes (indexes) and purified. Cluster generation was performed and samples passed for sequencing. Sufficient sequencing was performed on the Illumina HiSeqX system using 150 bp paired-end reads to achieve a mean coverage of >40X over the entire genome. The sequence data were converted from bcl file to FastQ file and demultiplexed using Bcl2fastq. A variety of coverage and quality metrics were produced and tested to determine sequencing success.

Secondary analysis was performed on FastQ files using an in-house developed pipeline. Reads were mapped using BWA-mem to the reference haploid human genome sequence (Genome Reference Consortium human genome build 37, human genome 19)<sup>4</sup>. SAMbamba was used to fixmate, sort, and index reads. Picard was used to mark duplicates. Finally, GATK was used to recalibrate and realign the reads. Coverage of genes, transcripts, and exons was analysed using an in-house developed tool called GCAT. Small variant calling (for SNVs, insertions, deletions, and indels) was performed using GATK. Larger structural variant calling was performed using Manta (26647377). Variant annotation to tag each variant with useful data points was performed using an in-house developed software, Codicem.

Variant filtering was performed within Codicem based on a number of criteria: low quality variants, variants present on an internally curated red herring list, variants within known polymorphic repeats that are not disease associated, and variants with less than 15% of reads supporting the variant call were excluded. Variants with a MAF of greater than 5% according to ExAC, TGP, or gnomAD (unless they were identified as pathogenic or likely pathogenic in ClinVar, or identified as high confidence disease associated variants in HGMD) were also excluded. Variants were additionally excluded if they were not frameshifts, premature stops, start site alterations, read throughs, splice site altering, amino acid deletions, duplications, insertions, or indels, non-synonymous amino acid changes (regardless of NS amino acid effect predictions), unless they had previously been identified as disease associated in either HGMD or ClinVar, were identified as possible promoter disruptions in curated datasets, had an extremely high CADD score (>20), or were identified as interesting near splice variants (within 10 nucleotides of the splice site with at least a moderately high predicted splice altering score).

Variant prioritization makes use of additional datasets and algorithms and is applied according to ACMG guidelines and internal SOPs<sup>5,6</sup>. All variants are given precomputed ACMG codes based on their characteristics, and these are used together with genotype - phenotype associations from HGMD, Online Mendelian Inheritance in Man (OMIM), ClinVar, and our in-house knowledge base, as well as direct knowledge and the literature to classify each variant into pathogenicity groupings so as to identify those that are deleterious and match the patient's clinical presentation. The reports generated from Codicem contain variant, gene, and disease findings related to the patient's clinical presentation, as well as medically actionable incidental findings (for minor and adult individuals) and carrier status (for adult individuals only) if consented. Variants on the report are confirmed by Sanger sequencing.

## **Metabolomics**

The Metabolomics Core is a collaboration between the Pacific Northwest National Laboratory (PNNL) in Richland, WA, and the Oregon Health & Science University (OHSU) in Portland, OR. Untargeted metabolomics, lipidomics, and glycoproteomics measurements are performed on plasma, urine, and cerebrospinal fluid (CSF) samples at PNNL using various separation methodologies (e.g. chromatography, ion mobility spectrometry) coupled with mass spectrometry. Oxylipid measurements are performed using a targeted mass spectrometry approach via collaboration with the Wayne State University Lipidomics Core. Metabolites, and lipids that are

identified as significantly different in UDN samples are interpreted in the context of known metabolic disease by the Oregon Health and Science University (OHSU), mapped to metabolic pathways (at both PNNL and OHSU), and mapped to patient sequencing data via collaboration with the sequencing cores.

As of May, 2017, the clinical sites submitted 191 total plasma, urine, and cerebrospinal fluid samples for analysis, corresponding to 57 probands and 43 first degree relatives.

To identify outlier molecules and associated pathways, data from UDN probands and first degree relatives are compared to corresponding data from a population of individuals with no known metabolic disease and matching the current demographics of the UDN cohort as closely as possible (e.g., primarily pediatric age range, majority Caucasian, and equal sex). When possible, samples are collected from patients at multiple times to partially account for differences in metabolic profiles due to for example circadian effects, fasting vs. non-fasting states (some patients are difficult to fast) , and symptomatic vs. asymptomatic periods.

### **Central biorepository**

The UDN biorepository is located at Vanderbilt University Medical Center in the Division of Medical Genetics and Genomic Medicine. The biorepository serves as a centralized facility for secure storage, tracking, and distribution of biological material collected during UDN studies.

### **Environmental exposure**

An Environmental Exposures questionnaire is implemented with electronic data entry by UDN patients (or their caretakers/family members). Previously utilized questionnaires and environmental exposure experts are utilized to develop this questionnaire. Topics covered include occupational exposures, residential exposures, drugs/tobacco/alcohol, hobbies, and parental exposures before and during pregnancy.

### **Model Organisms Screening Center**

The MOSC (Model Organisms Screening Center) assesses whether the candidate gene variants identified in patients by the Clinical Sites and Sequencing Cores can explain the observed clinical features of the patients by performing genetic experiments in *Drosophila* and zebrafish. As of May, 2017, the clinical sites had submitted for consideration 157 variants in 122 genes, this representing 69 independent families from all 7 sites. Certain of these were explored through 34 fly models, 7 fish models and 2 genes modeled in both cores. The human variants are first analyzed bioinformatically using MARRVEL (<http://marrvel.org/>), a human and model organism database aggregation tool developed for the UDN.<sup>7</sup> These analyses provide a filter to select high priority genes that are then assigned to either the *Drosophila* or Zebrafish Core depending on the evolutionary conservation of the gene and the patient's phenotypes.

### **Bioinformatic analysis of genes and variants submitted to the MOSC**

The variants in the gene sequences for each UDN patient are first assessed by screening public human genetics and genomics databases (OMIM, ExAC, Geno2MP, ClinVar, DGV and DECIPHER), as well as by screening

databases for homologs of seven model organisms (yeasts, worm, flies, fish, mice and rats). The MOSC developed a data mining tool named MARRVEL (Model organism Aggregated Resources for Rare Variant ExpLoration<sup>7</sup>) that collects useful information from these databases and outputs them in a comprehensive and integrated manner. MARRVEL displays information related to 1) whether the gene of interest has been linked to disease, 2) whether a variant of interest is found in disease or control populations, 3) a table of predicted orthologs in 7 genetic model organisms, 4) known gene function and expression information of the human gene and model organism orthologs, and 5) protein structural domain and multi-species protein sequence alignment. These data are used to assess the likelihood that the variants and their corresponding genes are responsible for the phenotype observed in the UDN patient, and also to determine the best organism and strategy to study them experimentally in vivo. The presence of a good matching ortholog of the human gene and the phenotype to be assessed determines which species is selected. In parallel, we query other private human genomic databases through collaborations with the Baylor-Hopkins Center for Mendelian Genomics<sup>8</sup> and Baylor Genetics<sup>9,10</sup> to identify additional matching cases for genotypes and phenotypes.

### **Experimental work in the *Drosophila* and Zebrafish Cores**

The *Drosophila* Core primarily studies whether the specific candidate variants have functional consequences using fruit flies. If there is an apparent ortholog of the candidate gene, the case is pursued in the *Drosophila* Core. The standard strategy is to knock out the endogenous gene by inserting a T2A-GAL4 cassette in a coding exon of a gene based on the Trojan Exon Cassette strategy<sup>11</sup> using the Minos-mediated Insertion Cassette (MiMIC)<sup>12</sup> or CRISPR/Cas9.<sup>13</sup> T2A-GAL4 inactivates the function of the fly gene of interest by functioning as a gene-trap cassette, and the GAL4 that is transcribed and translated from the same locus allows replacement of the fly gene with the human cDNA driven by the Upstream Activating Sequence (UAS). By expressing the human cDNA in the proper spatial and temporal expression pattern, the loss of the fly gene function can be rescued with the human UAS-cDNA in a substantial number of cases (~70%). This strategy then allows us to test whether the variant found in the patient is able to rescue the phenotype or not. If the wild-type cDNA rescued but the mutant does not, we conclude that the variant is functional and that it is likely that the variant is pathogenic. If the variant does rescue, it can be a subtle loss of function allele, a gain of function allele, or a benign variant that is not causing the observed phenotype in the patient. Additional experiments, such as over-expression of the human cDNAs in a wild-type fly, are typically performed to distinguish among these possibilities. Because each case is unique, alternative strategies, for example, introducing a homologous variant into the fly gene by combining a mutant allele and a BAC transgene when a reference human cDNA was not able to rescue the fly T2A-GAL4 line<sup>14</sup>, may be applied to investigate the variant of interest. If there is no obvious homologue in flies, the MOSC relies on fish genetics. The Zebrafish Core generate at least two individual knockout lines for the gene of interest using the CRISPR/Cas9 system.<sup>15</sup> We then cross the heterozygous animals together and assesses the phenotype in the biallelic mutant animal to minimize the influence of any potential second site hits caused by CRISPR. The advantage of zebrafish is that the phenotypes are easier to associate with the observed human phenotypes.<sup>16,17</sup> In some cases, rescue experiments are

attempted using reference and wild-type human cDNAs by generating stable transgenic lines or through microinjection of mRNAs into one cell stage embryos.

In one study by Chao et al. (2017)<sup>18</sup>, a de novo variant in EBF3 discovered in a child with global developmental delay, intellectual disability, and expressive speech disorder was submitted by the NIH-UDP. By searching additional human genomic databases, patients with overlapping phenotypes with de novo variants were found in collaboration with Baylor Genetics, Texas Children's Hospital, and NYU Langone. The two de novo variants in EBF3, the human homolog of a transcription factor first identified as knot/collier in fruit flies<sup>19</sup>, when tested in flies behaved as severe loss-of-function alleles and failed to activate transcription in mammalian cellular reporter-based assays. In another study, Luo et al. (2017)<sup>14</sup> tested several dominant mutations in a specific transmembrane domain of CACNA1A associated with different neurological presentations in children identified by the Baylor Clinical Site using *Drosophila*. One point mutation (p.R1664Q) causes early global developmental delay whereas another variant (p.R1673P) in the same transmembrane domain is associated with similar early onset delay but also with progressive degeneration of the cerebellum in the affected patient. When tested in *Drosophila*, the R1664Q variant corresponds to a loss-of-function allele, whereas the R1673P variant behaved as a gain-of-function allele and caused neurodegeneration, a phenotype that likely arises from calcium excitotoxicity. Such findings across species validate the use of model organisms in testing for functional variants in human disease. Finally, the MOSC has facilitated collaborations between the UDN and other clinical genome sequencing initiatives (e.g., Centers for Mendelian Genomics) leading to the identification of a novel neurodevelopmental disorder characterized by microcephaly, profound developmental delays, intellectual disability, epilepsy, and failure to thrive.<sup>20</sup>

## Data sharing

Data are shared as broadly as possible to increase the likelihood of making diagnoses. During the application process, patients give consent to have their data shared within and outside of the UDN. Clinical, biospecimen, and sequencing data are shared in the secure UDN Gateway environment. The UDN coordinating center, located in the Department of Biomedical Informatics at Harvard Medical School, shares de-identified participant phenotypic and genotypic data in publicly accessible databases, including the database of Genotypes and Phenotypes (dbGaP),<sup>19</sup> PhenomeCentral,<sup>20</sup> and ClinVar.<sup>21</sup> Through PhenomeCentral, case information is also accessible to other databases participating in the Matchmaker Exchange.<sup>22</sup>

Participants also have the option of making their data available on the public-facing UDN website in the form of participant pages (**Supplementary Figure 2**). The goal of sharing data on the UDN website is to identify additional patients with similar phenotypes and genomic variants, a critical aspect of the investigation of rare diseases.



## **Sociology study**

Between January, 2015, and March, 2017, observations of the UDN served as the fieldwork for a research project in sociology on the government of genomic data and science. The method used was multi-sited ethnography. Observations in all sites except two and 83 interviews with representatives of all sites were performed.

## **Participant engagement**

The UDN Participant Engagement and Empowerment Resource (PEER) was established to gain participant and family member perspectives on UDN research goals and participant experience. The PEER engages with UDN investigators to develop and assess participant-oriented materials and identify best practices for receiving participant input in research. Overarching goals of the PEER are to foster longstanding relationships among participants, families, and researchers; promote participant empowerment; educate participants and families on the essential dual clinical/research mission of the UDN; and encourage future engagement in research studies.

## **Patient reported outcomes**

Investigation of psychosocial processes and outcomes are also conducted through surveys using validated measures in order to understand better the participant's perspective on what it is like to live with an undiagnosed condition and subsequent effects on individuals of discovering a condition's etiology.

## **Results**

### **Metabolomics**

The metabolomics core was added to the UDN in September, 2015. Its first efforts focused on generating reference data sets from analyses of plasma, urine, or cerebrospinal fluid from 390 individuals with no known metabolic disease and matching the demographics of the UDN cohort as closely as possible. The numbers of individuals needed to construct the reference data sets were determined by statistical power analysis of historical metabolomics and lipidomics data from the PNNL Metabolomics Core and assuming an unbalanced study design of  $n < 2$  for the diseased group and  $n > 100$  for the unaffected group, which determined that data from 80-120 individuals with no known metabolic disease were required to detect a 2-fold change in over 90 percent of measured molecules at a type 1 error rate of  $\alpha = 0.05$ . Over the course of one year, a total of 1648 individual analyses were conducted on samples from the 390 individuals described above for the establishment of metabolomics and lipidomics reference datasets, the data from which are compared against corresponding data from UDN cases to identify molecules characteristic of their disease.

### **Analysis of NR5A1 Overexpression and the Effects of the R92W Mutation**

Multiple mutations in SF-1 (NR5A1) have been implicated in human sex development, and Bashamboo et al. in 2016<sup>21</sup> identified patients heterozygous for a new NR5A1 allele, p.R92W. DNA binding experiments indicated

decreased interaction with target sites in vitro, and cell culture experiments suggested that NR5A1 p.R92W has a weakened ability to activate transcription. The *Drosophila* homolog of NR5A1, Ftz-F1, is necessary for the formation of alternate body segments in early embryos,<sup>22,23</sup> and NR5A1 can rescue the phenotype of *Drosophila* mutants,<sup>24</sup> providing an in vivo environment for functional analysis. Overexpression of NR5A1 at intermediate levels results in a severe pair-rule cuticle defect with loss of odd-numbered segments. In contrast, similar overexpression of NR5A1 p.R92W does not disrupt development (**Figure 1**). Yet, a further increase of NR5A1 p.R92W resulted in an intermediate pair-rule phenotype. These data provide further compelling evidence that NR5A1 p.R92W is indeed a partial loss-of-function mutant.

## References

1. Inc I. *Multiplexing Sample Preparation Guide (Part # 1005361 Rev. D)*.; 2011.
2. Roche NimbleGen I. *NimbleGen SeqCap EZ Exome Library SR User's Guide (Version 2.2)*.; 2010.
3. Bainbridge MN, Wang M, Wu Y, et al. Targeted enrichment beyond the consensus coding DNA sequence exome reveals exons with higher variant densities. *Genome Biol.* 2011;12(7):R68.
4. Li H, Durbin R. Fast and accurate short read alignment with Burrows-Wheeler transform. *Bioinformatics.* 2009;25(14):1754-1760.
5. Richards S, Aziz N, Bale S, et al. Standards and guidelines for the interpretation of sequence variants: a joint consensus recommendation of the American College of Medical Genetics and Genomics and the Association for Molecular Pathology. *Genet Med.* 2015;17(5):405-424.
6. Yang Y, Wang J, Xia F, et al. Adaptation of the ACMG/AMP Standards and Guidelines for Variant Interpretation: Experience within a Clinical Laboratory. In: *American College of Medical Genetics Annual Meeting. 2016.*
7. Wang J, Al-Ouran R, Hu Y, et al. MARRVEL: Integration of Human and Model Organism Genetic Resources to Facilitate Functional Annotation of the Human Genome. *Am J Hum Genet.* 2017;100(6):843-853.
8. Chong JX, Buckingham KJ, Jhangiani SN, et al. The Genetic Basis of Mendelian Phenotypes: Discoveries, Challenges, and Opportunities. *Am J Hum Genet.* 2015:1-17.
9. Yang Y, Muzny DM, Reid JG, et al. Clinical Whole-Exome Sequencing for the Diagnosis of Mendelian Disorders. *N Engl J Med.* October 2013:131002140031007.
10. Yang Y, Muzny DM, Xia F, et al. Molecular findings among patients referred for clinical whole-exome sequencing. *JAMA.* 2014;312(18):1870-1879.
11. Diao F, White BH. A novel approach for directing transgene expression in *Drosophila*: T2A-Gal4 in-frame fusion. *Genetics.* 2012;190(3):1139-1144.
12. Venken KJT, Schulze KL, Haelterman NA, et al. MiMIC: a highly versatile transposon insertion resource for engineering *Drosophila melanogaster* genes. *Nat Methods.* 2011;8(9):737-743.
13. Bellen HJ, Yamamoto S. Morgan's legacy: fruit flies and the functional annotation of conserved

genes. *Cell*. 2015;163(1):12-14.

14. Luo X, Rosenfeld JA, Yamamoto S, et al. Clinically Severe CACNA1A Alleles Affect Synaptic Function and Neurodegeneration Differentially. *PLoS Genet*.
15. Hwang WY, Fu Y, Reyon D, et al. Efficient genome editing in zebrafish using a CRISPR-Cas system. *Nat Biotechnol*. 2013;31(3):227-229.
16. Blanco-Sánchez B, Clément A, Phillips JB, Westerfield M. Zebrafish models of human eye and inner ear diseases. *Methods Cell Biol*. 2017;138:415-467.
17. Phillips JB, Westerfield M. Zebrafish models in translational research: tipping the scales toward advancements in human health. *Dis Model Mech*. 2014;7(7):739-743.
18. Chao H-T, Davids M, Burke E, et al. A Syndromic Neurodevelopmental Disorder Caused by De Novo Variants in EBF3. *Am J Hum Genet*. 2017;100(1):128-137.
19. Crozatier M, Valle D, Dubois L, Ibsouda S, Vincent A. Collier, a novel regulator of Drosophila head development, is expressed in a single mitotic domain. *Curr Biol*. 1996;6(6):707-718.
20. Schoch K, Meng L, Szelinger S, et al. A Recurrent De Novo Variant in NACC1 Causes a Syndrome Characterized by Infantile Epilepsy, Cataracts, and Profound Developmental Delay. *Am J Hum Genet*. 2017;100(2):343-351.
21. Bashamboo A, Donohoue PA, Vilain E, et al. A recurrent p.Arg92Trp variant in steroidogenic factor-1 (NR5A1) can act as a molecular switch in human sex development. *Hum Mol Genet*. 2016;25(23):5286.
22. Yu Y, Li W, Su K, et al. The nuclear hormone receptor Ftz-F1 is a cofactor for the Drosophila homeodomain protein Ftz. *Nature*. 1997;385(6616):552-555.
23. Guichet A, Copeland JW, Erdélyi M, et al. The nuclear receptor homologue Ftz-F1 and the homeodomain protein Ftz are mutually dependent cofactors. *Nature*. 1997;385(6616):548-552.
24. Lu Y, Anderson WR, Zhang H, Feng S, Pick L. Functional conservation of Drosophila FTZ-F1 and its mammalian homologs suggests ligand-independent regulation of NR5A family transcriptional activity. *Dev Genes Evol*. 2013;223(3):199-205.

Figure S1. Applicant geographic distribution

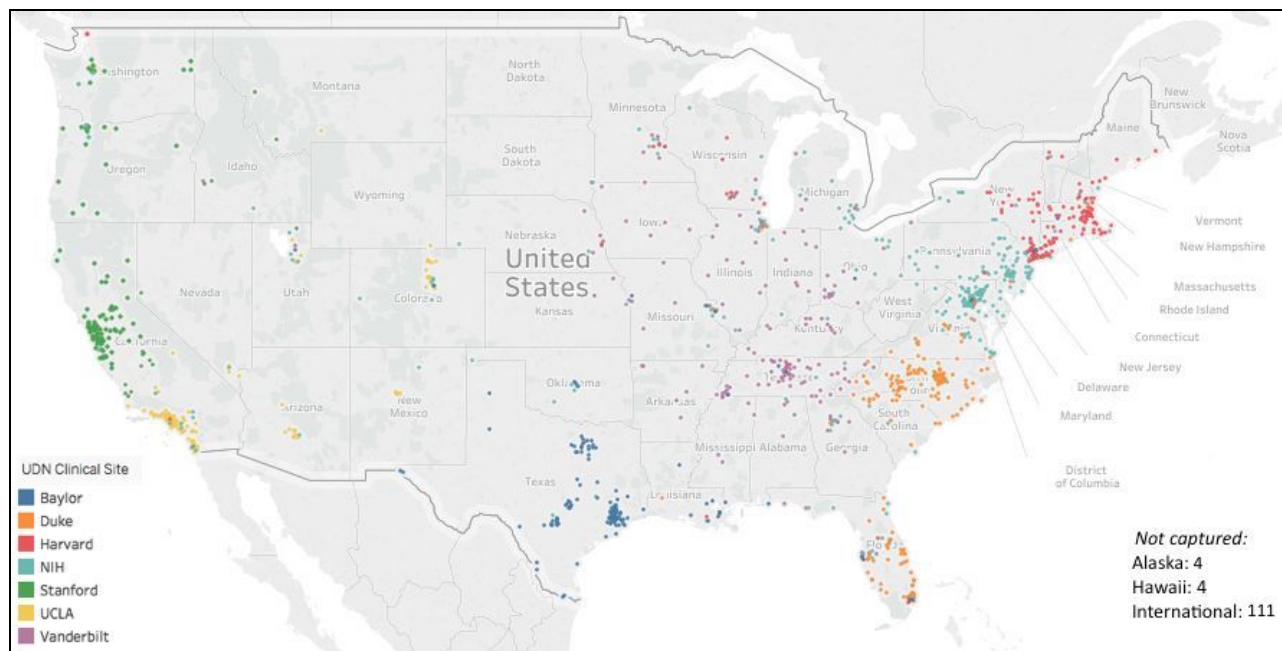

Figure S1. Applicant geographic distribution

Figure S2. Participant page

**Participant 006**

On this page, you will find information about a UDN participant. We are trying to find others with the same or similar condition. (Sharing information on this website is not a requirement of UDN participation. Only descriptions about participants who give explicit consent will appear here.)

Male, age 3 with low muscle tone (hypotonia), developmental delay, and increased weight

[YouTube Channel](#)

If any of these participants sound like you or someone you know, please contact us!

[CONTACT US](#)

|                         |                                                                                                                                                                                                                                                                                                                                                                                                                                                                                                                                                                                                                                                                                                                                                                                                                                                                                                                                                                |
|-------------------------|----------------------------------------------------------------------------------------------------------------------------------------------------------------------------------------------------------------------------------------------------------------------------------------------------------------------------------------------------------------------------------------------------------------------------------------------------------------------------------------------------------------------------------------------------------------------------------------------------------------------------------------------------------------------------------------------------------------------------------------------------------------------------------------------------------------------------------------------------------------------------------------------------------------------------------------------------------------|
| <b>Date of Report</b>   | Aug 05, 2016                                                                                                                                                                                                                                                                                                                                                                                                                                                                                                                                                                                                                                                                                                                                                                                                                                                                                                                                                   |
| <b>Description</b>      | <p>This patient is 3 years old and has low muscle tone (hypotonia), developmental delay, and increased weight. During the first trimester of pregnancy, there was a concern of increased amniotic fluid (polyhydramnios). The patient was born by C-section at 38 weeks and his birth weight was 6 pounds 14 ounces. He had trouble gaining weight initially, but then had issues of being overweight starting at 6 months. A muscle biopsy was performed and showed myofiber smallness mostly affecting type 1 fibers, which is consistent with dysmaturational myopathy. Overall, the patient has been in good health.</p> <p>Developmentally, the patient has been making progress with therapies he is receiving. His receptive language is good and sensory processing issues are improving. However, he does seem to be regressing in spoken language. In June of 2014, his parents reported that he had about 40-50 words, but now he has very few.</p> |
| <b>Symptoms / Signs</b> | <ul style="list-style-type: none"> <li>▶ Low muscle tone (hypotonia)</li> <li>▶ Muscle weakness</li> <li>▶ Increased body weight</li> </ul>                                                                                                                                                                                                                                                                                                                                                                                                                                                                                                                                                                                                                                                                                                                                                                                                                    |

Figure S2. Example of a participant web page.

**Figure S3. Metabolomic data suggesting 3-hydroxy-3-methylglutaryl-CoA lyase deficiency diagnosis**

| Metabolite                      | Proband 1 | Proband 2 | Proband 3 | Proband 4 | Proband 5 | Mother | Z-Score |
|---------------------------------|-----------|-----------|-----------|-----------|-----------|--------|---------|
| 3-hydroxy-3-methylglutaric acid | 3.83      | 6.87      | 2.94      | 3.09      | 3.74      | -0.63  | + 5     |
| L-valine                        | 3.64      | 1.82      | 2.99      | 2.21      | 3.92      | -0.87  |         |
| D-glucuronic acid               | 3.38      | 2.72      | 1.22      | 1.83      | 1.42      | 2.05   |         |
| xylitol                         | 1.89      | 1.91      | 2.11      | 2.86      | 1.93      | -1.06  |         |
| catechol                        | -2.61     | -2.09     | -0.67     | -0.06     | -0.29     | 0.77   |         |
| glycerol 3-phosphate            | -2.79     | 0.23      | -3.62     | -4.70     | NA        | -2.97  |         |
| p-cresol                        | -2.83     | -2.86     | -2.54     | -2.70     | -1.89     | 0.94   | - 5     |

Figure S3. Urine metabolomics suggest 3-hydroxy-3-methylglutaryl-CoA lyase deficiency. The proband has significant elevations (Z-Score >2.0) of 3-hydroxy-3-methylglutaric acid in 5 separate urine samples. Values correspond to the z-score of the difference in the level of each metabolite in comparison to the data from the reference samples. Red- positive, Blue - negative z-score. Exome sequencing subsequently revealed an exon deletion in *HMGL*.

**Table S1. Applicants not accepted for evaluation**

|                        | <b>Total (n= 589)</b> | <b>Pediatric applicants (n= 104)</b> | <b>Adult applicants (n= 485)</b> |
|------------------------|-----------------------|--------------------------------------|----------------------------------|
| <b>Sex</b>             |                       |                                      |                                  |
| Males, n (%)           | 264 (44.8)            | 57 (54.8)                            | 207 (42.7)                       |
| Females, n (%)         | 322 (54.7)            | 47 (45.2)                            | 275 (56.7)                       |
| Other, n (%)           | 3 (0.5)               | 0 (0.0)                              | 3 (0.6)                          |
| <b>Age<sup>a</sup></b> | 39 +/- 21             | 8 +/- 5                              | 45 +/- 16                        |

<sup>a</sup>The mean age +/- standard deviation (in years) is indicated.

**Table S2. UDN diagnoses and clinical actions**

| Diagnosis name                                      | Gene name | Prior sequencing         | Chief method used to achieve diagnosis                                                                   | Type of UDN sequencing   | Keys to making diagnosis                                                                                        | If diagnosis made on re-analysis of existing data, was the variant missed before or was the disease association not known previously? | Diagnosis category* | Brief description of management change                                                                                                                                                                                                                                                     |
|-----------------------------------------------------|-----------|--------------------------|----------------------------------------------------------------------------------------------------------|--------------------------|-----------------------------------------------------------------------------------------------------------------|---------------------------------------------------------------------------------------------------------------------------------------|---------------------|--------------------------------------------------------------------------------------------------------------------------------------------------------------------------------------------------------------------------------------------------------------------------------------------|
| Mental retardation, x-linked 102                    | DDX3X     | None                     | Genome-scale sequencing including genome sequencing and exome sequencing                                 | Proband exome sequencing | Sequencing; timing                                                                                              | N/A                                                                                                                                   | 2                   | Testing for mitochondrial dysfunction. Clarify prognosis to prevent further unnecessary diagnostic testing or treatment.                                                                                                                                                                   |
| Neurosarcoidosis                                    | None      | Proband exome sequencing | Diagnosis made primarily on clinical grounds, including aggregate assessment of non-specific test result | None                     | Autopsy/pathology                                                                                               | N/A                                                                                                                                   | 2                   | No management change; diagnosis confirmed at autopsy.                                                                                                                                                                                                                                      |
| Spastic paraplegia 11                               | SPG11     | None                     | Genome-scale sequencing including genome sequencing and exome sequencing                                 | Duo exome sequencing     | Research sequencing analysis                                                                                    | N/A                                                                                                                                   | 1                   | Suggested alterations in anti-psychotic medications that could be worsening her condition; recommended that patient contact neurology and mental health team to discuss options for reducing dose of some of her medications (baclofen, antipsychotic medications)                         |
| CACNA1A-related condition                           | CACNA1A   | Proband exome sequencing | Genome-scale sequencing including genome sequencing and exome sequencing                                 | None                     | Including additional family members; research sequencing analysis; matchmaking; basic research (model organism) | Variant was not highlighted on clinical report because the phenotype did not fit the known condition, this was a phenotype expansion. | 3                   | Treatment with acetazolamide not effective, UDN subject was started on a calcium channel blocker (flunarizine) after the UDN evaluation and the model organism data suggested gain of calcium channel function                                                                             |
| X-linked adrenoleukodystrophy/Adrenomyeloneuropathy | ABCD1     | None                     | Genome-scale sequencing including genome sequencing and exome sequencing                                 | Quintet exome sequencing | Including additional family members                                                                             | N/A                                                                                                                                   | 1                   | Provided risks for children of affected individuals. Referred affected individuals for appropriate screening for adrenal and brain involvement. Treatment available for certain complications- reduce baclofen, consider use of botulinum toxin injections, discontinue B6 supplementation |
| 46,XX testicular disorder of sexual development     | NR5A1     | None                     | Genome-scale sequencing including genome sequencing and exome sequencing                                 | Duo genome sequencing    | Research sequencing analysis; matchmaking                                                                       | N/A                                                                                                                                   | 3                   | No management change.                                                                                                                                                                                                                                                                      |
| Coffin-Lowry syndrome                               | RPS6KA3   | None                     | Genome-scale sequencing including genome sequencing and exome sequencing                                 | Trio exome sequencing    | Sequencing                                                                                                      | N/A                                                                                                                                   | 2                   | Audiology assessment. Clarify prognosis to prevent further unnecessary diagnostic testing or treatment (specifically, may help guide psychiatric treatment).                                                                                                                               |



| Diagnosis name                                                                               | Gene name | Prior sequencing         | Chief method used to achieve diagnosis                                   | Type of UDN sequencing | Keys to making diagnosis                     | If diagnosis made on re-analysis of existing data, was the variant missed before or was the disease association not known previously?                                                                                                                                                                       | Diagnosis category* | Brief description of management change                                                                                                                                                                                                                                   |
|----------------------------------------------------------------------------------------------|-----------|--------------------------|--------------------------------------------------------------------------|------------------------|----------------------------------------------|-------------------------------------------------------------------------------------------------------------------------------------------------------------------------------------------------------------------------------------------------------------------------------------------------------------|---------------------|--------------------------------------------------------------------------------------------------------------------------------------------------------------------------------------------------------------------------------------------------------------------------|
| DES-related condition                                                                        | DES       | None                     | Genome-scale sequencing including genome sequencing and exome sequencing | Quad exome sequencing  | Sequencing                                   | N/A                                                                                                                                                                                                                                                                                                         | 1                   | Other family members diagnosed. Cardiac monitoring. A recent report (Neurology 2016;87:799-805) suggested treatment with Salbutamol improved muscle function in a patient.                                                                                               |
| SCN4A-related condition                                                                      | SCN4A     | Proband exome sequencing | Genome-scale sequencing including genome sequencing and exome sequencing | Quad genome sequencing | Sequencing; timing                           | Gene was associated with dominant disease. This was a new recessive condition associated with the gene that had only recently been published.                                                                                                                                                               | 3                   | No management changes (self-resolving condition). Allowed recurrence risk counseling.                                                                                                                                                                                    |
| TRIP11-related condition                                                                     | TRIP11    | None                     | Genome-scale sequencing including genome sequencing and exome sequencing | Trio exome sequencing  | Sequencing                                   | N/A                                                                                                                                                                                                                                                                                                         | 2                   | Recurrence risk; provided guidance including pursuing sleep study, guidance on feeding/nutrition. Many recommendations based on having a short stature skeletal dysplasia, not necessarily specific to her condition, since there have been no reports of similar cases. |
| Combined oxidative phosphorylation deficiency 20                                             | VARS2     | Proband exome sequencing | Genome-scale sequencing including genome sequencing and exome sequencing | Trio exome sequencing  | Research sequencing analysis; basic research | One variant was filtered out because it is intronic. Research analysis needed to highlight it for consideration for the diagnosis.                                                                                                                                                                          | 1                   | Recurrence risk; Confirmation that underlying defect impacts mitochondrial function, which has implications for treatment/anti-epileptic agents to use and avoid.                                                                                                        |
| POMP-related condition                                                                       | POMP      | Proband exome sequencing | Genome-scale sequencing including genome sequencing and exome sequencing | None                   | Matchmaking; basic research                  | Pathogenic variant was included on the original clinical report. At the time, though, the gene was only associated with a recessive condition, and this is a new presentation of a dominant condition associated with disease. Matchmaking and additional research was required to establish pathogenicity. | 3                   | Reconsidering bone marrow transplant option for treatment.                                                                                                                                                                                                               |
| Spinocerebellar ataxia, autosomal recessive 8                                                | SYNE1     | None                     | Genome-scale sequencing including genome sequencing and exome sequencing | Duo exome sequencing   | Sequencing                                   | N/A                                                                                                                                                                                                                                                                                                         | 1                   | Clarify prognosis to prevent further unnecessary diagnostic testing or treatment.                                                                                                                                                                                        |
| Congenital heart defect, dysmorphic facial features, and intellectual developmental disorder | CDK13     | Proband exome sequencing | Genome-scale sequencing including genome sequencing and exome sequencing | Trio exome sequencing  | Sequencing; timing                           | Disease association was not known previously.                                                                                                                                                                                                                                                               | 2                   | Developed the first medical management guidelines for this syndrome; exploring possibility of re-purposing a known pharmaceutical (CDK13 inhibitors)                                                                                                                     |

| Diagnosis name                                   | Gene name | Prior sequencing         | Chief method used to achieve diagnosis                                                                   | Type of UDN sequencing | Keys to making diagnosis                                                                       | If diagnosis made on re-analysis of existing data, was the variant missed before or was the disease association not known previously?                                                                                                                                                                                                                                                                                                   | Diagnosis category* | Brief description of management change                                                                                                                            |
|--------------------------------------------------|-----------|--------------------------|----------------------------------------------------------------------------------------------------------|------------------------|------------------------------------------------------------------------------------------------|-----------------------------------------------------------------------------------------------------------------------------------------------------------------------------------------------------------------------------------------------------------------------------------------------------------------------------------------------------------------------------------------------------------------------------------------|---------------------|-------------------------------------------------------------------------------------------------------------------------------------------------------------------|
| COMBINED OXIDATIVE PHOSPHORYLATION DEFICIENCY 31 | MIPEP     | Proband exome sequencing | Genome-scale sequencing including genome sequencing and exome sequencing                                 | Trio exome sequencing  | Research sequencing analysis                                                                   | Disease was unknown at time of clinical proband sequencing. Disease known at time of trio exome sequencing, and single variant was highlighted. Took additional analyses and testing to confirm a deletion on the other allele.                                                                                                                                                                                                         | 1                   | Recurrence risk; Confirmation that underlying defect impacts mitochondrial function, which has implications for treatment/anti-epileptic agents to use and avoid. |
| 17p13.3 deletion                                 | None      | Proband exome sequencing | Non-sequencing, genome-wide diagnostic assay (for example, SNP array, oligo array or karyotype)          | None                   | Matchmaking                                                                                    | N/A                                                                                                                                                                                                                                                                                                                                                                                                                                     | 3                   | Recurrence risk (father has deletion). Sleep study performed.                                                                                                     |
| Alexander disease                                | GFAP      | None                     | Genome-scale sequencing including genome sequencing and exome sequencing                                 | Duo exome sequencing   | Sequencing                                                                                     | N/A                                                                                                                                                                                                                                                                                                                                                                                                                                     | 2                   | Clarify prognosis to prevent further unnecessary diagnostic testing or treatment (specifically, how to monitor/treat brain lesions).                              |
| 17p13.3 deletion                                 | None      | Proband exome sequencing | Non-sequencing, genome-wide diagnostic assay (for example, SNP array, oligo array or karyotype)          | None                   | Matchmaking                                                                                    | N/A                                                                                                                                                                                                                                                                                                                                                                                                                                     | 3                   | Sleep study & neuropsychology evaluation done.                                                                                                                    |
| Noonan-like syndrome                             | LZTR1     | Proband exome sequencing | Genome-scale sequencing including genome sequencing and exome sequencing                                 | Trio exome sequencing  | Including additional family members; research sequencing analysis; matchmaking; RNA sequencing | Disease association was not known at the time of the proband exome. Disease association known at time of reporting for the UDN exome, but the condition was a phenotype expansion (recessive disease for a gene previously only described as dominant). Variant did not get included on that clinical report because of phenotype expansion. Additionally, second variant is intronic and was therefore not part of the exome analysis. | 3                   | Recurrence risk; Consider cancer surveillance in children and carriers.                                                                                           |
| Oral-Facial-Digital syndrome, type unknown       | None      | Trio exome sequencing    | Diagnosis made primarily on clinical grounds, including aggregate assessment of non-specific test result | Trio genome sequencing | Phenotyping                                                                                    | N/A                                                                                                                                                                                                                                                                                                                                                                                                                                     | 1                   | No change in medical management.                                                                                                                                  |
| AGTPBP1-related condition                        | AGTPBP1   | Duo exome sequencing     | Genome-scale sequencing including genome sequencing and exome sequencing                                 | None                   | Reanalysis of prior sequencing data; matchmaking; basic research                               | Variants classified as VUS by clinical lab, disease association not known. Exome reanalyzed by UDN 5mos after initial report                                                                                                                                                                                                                                                                                                            | 4                   | Enabled accurate genetic counseling.                                                                                                                              |

| Diagnosis name                                 | Gene name | Prior sequencing      | Chief method used to achieve diagnosis                                                                                               | Type of UDN sequencing                        | Keys to making diagnosis                              | If diagnosis made on re-analysis of existing data, was the variant missed before or was the disease association not known previously? | Diagnosis category* | Brief description of management change                                                                                                        |
|------------------------------------------------|-----------|-----------------------|--------------------------------------------------------------------------------------------------------------------------------------|-----------------------------------------------|-------------------------------------------------------|---------------------------------------------------------------------------------------------------------------------------------------|---------------------|-----------------------------------------------------------------------------------------------------------------------------------------------|
| SCN2A-related condition                        | SCN2A     | None                  | Genome-scale sequencing including genome sequencing and exome sequencing                                                             | Duo exome sequencing                          | Sequencing                                            | N/A                                                                                                                                   | 1                   | Adjustment to anti-epileptic medication (recommended trials of medications that target sodium channels); enabled accurate genetic counseling. |
| Nephronophthisis 1                             | NPHP1     | Trio exome sequencing | Genome-scale sequencing including genome sequencing and exome sequencing                                                             | Trio genome sequencing                        | Research copy number variant analysis                 | Variant was missed due to difficulty with recognizing large CNVs in exome data.                                                       | 1                   | Enabled accurate genetic counseling.                                                                                                          |
| 16p11.2 deletion                               | STX1B     | Trio exome sequencing | Non-sequencing, genome-wide diagnostic assay (for example, SNP array, oligo array or karyotype)                                      | Trio genome sequencing                        | Timing                                                | N/A                                                                                                                                   | 3                   | No change in medical management                                                                                                               |
| Bainbridge-Ropers syndrome                     | ASXL3     | None                  | Genome-scale sequencing including genome sequencing and exome sequencing                                                             | Duo exome sequencing                          | Sequencing                                            | N/A                                                                                                                                   | 1                   | Enabled accurate genetic counseling.                                                                                                          |
| Marfan syndrome                                | FBN1      | None                  | Genome-scale sequencing including genome sequencing and exome sequencing                                                             | Trio exome sequencing                         | Sequencing                                            | N/A                                                                                                                                   | 2                   | Enabled accurate genetic counseling.                                                                                                          |
| Hyaline fibromatosis syndrome                  | ANTXR2    | Trio exome sequencing | Directed clinical testing based on phenotype (may be molecular, including gene panels; biochemical; radiologic; or, other test type) | None                                          | Phenotyping; targeted genetic testing                 | N/A                                                                                                                                   | 1                   | Enabled accurate genetic counseling.                                                                                                          |
| Infantile neuroaxonal dystrophy 1              | PLA2G6    | Trio exome sequencing | Directed clinical testing based on phenotype (may be molecular, including gene panels; biochemical; radiologic; or, other test type) | None                                          | Phenotyping; targeted genetic testing; basic research | N/A                                                                                                                                   | 1                   | Enabled accurate genetic counseling.                                                                                                          |
| CACNA1A-related condition                      | CACNA1A   | Trio exome sequencing | Genome-scale sequencing including genome sequencing and exome sequencing                                                             | None                                          | Phenotyping; reanalysis of targeted gene              | Variant missed using research exome sequencing.                                                                                       | 1                   | Possible adjustment to specific medications (vitamin B6, lamotrigine, acetazolamide or verapamil) and enabled accurate genetic counseling     |
| Cornelia de Lange syndrome 5                   | HDAC8     | Trio exome sequencing | Genome-scale sequencing including genome sequencing and exome sequencing                                                             | Quad exome sequencing, Trio genome sequencing | Sequencing                                            | N/A                                                                                                                                   | 1                   | Enabled accurate genetic counseling.                                                                                                          |
| Mucopolysaccharidosis type IIIB (Sanfilippo B) | NAGLU     | None                  | Genome-scale sequencing including genome sequencing and exome sequencing                                                             | Trio exome sequencing                         | Sequencing                                            | N/A                                                                                                                                   | 1                   | Enabled accurate genetic counseling.                                                                                                          |

| Diagnosis name                                                                                               | Gene name | Prior sequencing      | Chief method used to achieve diagnosis                                                                                               | Type of UDN sequencing | Keys to making diagnosis                                         | If diagnosis made on re-analysis of existing data, was the variant missed before or was the disease association not known previously? | Diagnosis category* | Brief description of management change                                                                                                  |
|--------------------------------------------------------------------------------------------------------------|-----------|-----------------------|--------------------------------------------------------------------------------------------------------------------------------------|------------------------|------------------------------------------------------------------|---------------------------------------------------------------------------------------------------------------------------------------|---------------------|-----------------------------------------------------------------------------------------------------------------------------------------|
| USP7-Related Condition                                                                                       | USP7      | None                  | Genome-scale sequencing including genome sequencing and exome sequencing                                                             | Trio exome sequencing  | Sequencing; matchmaking; basic research                          | N/A                                                                                                                                   | 4                   | Enabled accurate genetic counseling.                                                                                                    |
| Spastic paraplegia 7                                                                                         | SPG7      | None                  | Genome-scale sequencing including genome sequencing and exome sequencing                                                             | Duo exome sequencing   | Sequencing                                                       | N/A                                                                                                                                   | 1                   | Enabled accurate genetic counseling.                                                                                                    |
| Multiple pterygium syndrome, Escobar type                                                                    | None      | Quad exome sequencing | Diagnosis made primarily on clinical grounds, including aggregate assessment of non-specific test result                             | Quad genome sequencing | Phenotyping                                                      | N/A                                                                                                                                   | 1                   | No change in medical management.                                                                                                        |
| Neurodevelopmental disorder with epilepsy, cataracts, feeding difficulties, and delayed brain myelination    | NACC1     | Trio exome sequencing | Genome-scale sequencing including genome sequencing and exome sequencing                                                             | None                   | Matchmaking; basic research                                      | Variant classified as VUS on clinical exome report, disease association not known. Reanalysis performed 6 months after initial exome  | 4                   | Enabled accurate genetic counseling.                                                                                                    |
| Megalencephalic leukoencephalopathy with subcortical cysts 2B, remitting, with or without mental retardation | HEPACAM   | Duo exome sequencing  | Directed clinical testing based on phenotype (may be molecular, including gene panels; biochemical; radiologic; or, other test type) | None                   | Phenotyping                                                      | Variant classified as VUS on clinical exome report. Reanalysis performed 10 months after initial exome                                | 1                   | Enabled accurate genetic counseling.                                                                                                    |
| Shashi-Pena syndrome                                                                                         | ASXL2     | Trio exome sequencing | Genome-scale sequencing including genome sequencing and exome sequencing                                                             | Trio exome sequencing  | Matchmaking; basic research                                      | N/A                                                                                                                                   | 4                   | Enabled accurate genetic counseling.                                                                                                    |
| TBX2-related condition                                                                                       | TBX2      | Quad exome sequencing | Genome-scale sequencing including genome sequencing and exome sequencing                                                             | Quad genome sequencing | Sequencing; matchmaking; basic research (model organisms)        | N/A                                                                                                                                   | 4                   | Enabled accurate genetic counseling.                                                                                                    |
| SMARCC2- related condition                                                                                   | SMARCC2   | None                  | Genome-scale sequencing including genome sequencing and exome sequencing                                                             | Duo exome sequencing   | Matchmaking; basic research                                      | N/A                                                                                                                                   | 4                   | Enabled accurate genetic counseling.                                                                                                    |
| Rett syndrome                                                                                                | MECP2     | Trio exome sequencing | Genome-scale sequencing including genome sequencing and exome sequencing                                                             | Trio genome sequencing | Sequencing                                                       | N/A                                                                                                                                   | 1                   | Enabled more accurate genetic counseling; family has joined support groups; additional clinical screening based on published guidelines |
| IRF2BPL-related condition                                                                                    | IRF2BPL   | Trio exome sequencing | Genome-scale sequencing including genome sequencing and exome sequencing                                                             | None                   | Reanalysis of prior sequencing data; matchmaking; basic research | Uncertain (research exome, no formal report provided). Reanalysis was done 18 months after initial exome.                             | 4                   | Enabled accurate genetic counseling.                                                                                                    |
| Trigeminal trophic syndrome                                                                                  | None      | None                  | Diagnosis made primarily on clinical grounds, including aggregate assessment of non-specific test result                             | Trio exome sequencing  | Multidisciplinary approach                                       | N/A                                                                                                                                   | 1                   | None                                                                                                                                    |

| Diagnosis name                                    | Gene name | Prior sequencing      | Chief method used to achieve diagnosis                                                                                               | Type of UDN sequencing                      | Keys to making diagnosis                                                           | If diagnosis made on re-analysis of existing data, was the variant missed before or was the disease association not known previously?                                                                                                                                                                                                                                                                 | Diagnosis category* | Brief description of management change                                                                                                                   |
|---------------------------------------------------|-----------|-----------------------|--------------------------------------------------------------------------------------------------------------------------------------|---------------------------------------------|------------------------------------------------------------------------------------|-------------------------------------------------------------------------------------------------------------------------------------------------------------------------------------------------------------------------------------------------------------------------------------------------------------------------------------------------------------------------------------------------------|---------------------|----------------------------------------------------------------------------------------------------------------------------------------------------------|
| Lethal congenital contracture syndrome 7          | CNTNAP1   | None                  | Genome-scale sequencing including genome sequencing and exome sequencing                                                             | Quad exome sequencing                       | Pathology; matchmaking                                                             | N/A                                                                                                                                                                                                                                                                                                                                                                                                   | 2                   | None                                                                                                                                                     |
| Infantile neuroaxonal dystrophy 1                 | PLA2G6    | None                  | Directed clinical testing based on phenotype (may be molecular, including gene panels; biochemical; radiologic; or, other test type) | None                                        | Imaging                                                                            | N/A                                                                                                                                                                                                                                                                                                                                                                                                   | 1                   | Recommended supportive care per guidelines                                                                                                               |
| Mental retardation, autosomal dominant 5 (mosaic) | SYNGAP1   | Trio exome sequencing | Genome-scale sequencing including genome sequencing and exome sequencing                                                             | Trio exome sequencing (patient fibroblasts) | Reanalysis of prior sequencing data; sequencing of DNA from different tissue types | It may have been initially overlooked because it was a mosaic finding and the condition is not associated with some of the patient's unique physical findings that were highly emphasized by her prior providers. However, a detailed review of the family history and family photos showed that all such features were familial and not felt to be related to the patient's intellectual disability. | 2                   | Electroencephalography ordered to exclude unrecognized epilepsy, diagnosis provided to advocacy organization                                             |
| GABRG2-related encephalopathy                     | GABRG2    | Trio exome sequencing | Genome-scale sequencing including genome sequencing and exome sequencing                                                             | Trio genome sequencing                      | Matchmaking                                                                        | The variant was listed as a VUS on the patient's prior exome report, at the time this gene did not clearly fit the patient's severe epilepsy and intellectual disability phenotype, but multiple other patients with the same variant and a very similar phenotype have now been described.                                                                                                           | 3                   | Suggested alternative AEDs that might be helpful given genetic etiology                                                                                  |
| Epileptic encephalopathy, early infantile, 17     | GNAO1     | None                  | Genome-scale sequencing including genome sequencing and exome sequencing                                                             | Trio exome sequencing                       | Sequencing; team expertise                                                         | N/A                                                                                                                                                                                                                                                                                                                                                                                                   | 2                   | None                                                                                                                                                     |
| Epileptic encephalopathy, early infantile, 4      | STXBP1    | Trio exome sequencing | Non-sequencing, genome-wide diagnostic assay (for example, SNP array, oligo array or karyotype)                                      | None                                        | Targeted genetic testing                                                           | N/A                                                                                                                                                                                                                                                                                                                                                                                                   | 2                   | Patient will need to be monitored for seizures. Parents have low recurrence risk, but gonadal mosaicism has been described.                              |
| CAMK2B-related condition                          | CAMK2B    | None                  | Genome-scale sequencing including genome sequencing and exome sequencing                                                             | Trio exome sequencing                       | Timing; matchmaking                                                                | N/A                                                                                                                                                                                                                                                                                                                                                                                                   | 4                   | Unclear what the impact of future management will be since so little is known right now. Variant was de novo, indicating low recurrence risk for family. |
| Schaaf-Yang syndrome                              | MAGEL2    | None                  | Genome-scale sequencing including genome sequencing and exome sequencing                                                             | Trio exome sequencing                       | Sequencing                                                                         | N/A                                                                                                                                                                                                                                                                                                                                                                                                   | 1                   | Referrals to appropriate specialists based on diagnosis; connect with research group studying the disorder                                               |

| Diagnosis name                                                                  | Gene name | Prior sequencing         | Chief method used to achieve diagnosis                                                                                               | Type of UDN sequencing   | Keys to making diagnosis               | If diagnosis made on re-analysis of existing data, was the variant missed before or was the disease association not known previously? | Diagnosis category* | Brief description of management change                                                                                        |
|---------------------------------------------------------------------------------|-----------|--------------------------|--------------------------------------------------------------------------------------------------------------------------------------|--------------------------|----------------------------------------|---------------------------------------------------------------------------------------------------------------------------------------|---------------------|-------------------------------------------------------------------------------------------------------------------------------|
| Early infantile epileptic encephalopathy 44                                     | UBA5      | None                     | Genome-scale sequencing including genome sequencing and exome sequencing                                                             | Trio exome sequencing    | Sequencing; team expertise             | N/A                                                                                                                                   | 1                   | None                                                                                                                          |
| Mast cell activation disorder                                                   | None      | Proband exome sequencing | Diagnosis made primarily on clinical grounds, including aggregate assessment of non-specific test result                             | Quad genome sequencing   | Multidisciplinary approach             | N/A                                                                                                                                   | 2                   | Treatment- H1 and H2 antihistamines, mast cell stabilizers, leukotriene inhibitors                                            |
| Hypomyelinating leukodystrophy with atrophy of the basal ganglia and cerebellum | TUBB4A    | None                     | Directed clinical testing based on phenotype (may be molecular, including gene panels; biochemical; radiologic; or, other test type) | None                     | Timing                                 | N/A                                                                                                                                   | 1                   | Suggested trial of Sinemet to help with involuntary movements associated with the disorder                                    |
| Basal ganglia calcification, idiopathic, 1 (formerly Fahr disease)              | SLC20A2   | None                     | Genome-scale sequencing including genome sequencing and exome sequencing                                                             | Proband exome sequencing | Multidisciplinary approach; sequencing | N/A                                                                                                                                   | 1                   | Recurrence risk and family planning                                                                                           |
| Lewy body dementia, Parkinson's disease                                         | None      | None                     | Diagnosis made primarily on clinical grounds, including aggregate assessment of non-specific test result                             | Duo exome sequencing     | Re-evaluation of clinical data         | N/A                                                                                                                                   | 1                   | Prognostication and management                                                                                                |
| Peroxisomal disorder                                                            | PEX1      | None                     | Directed clinical testing based on phenotype (may be molecular, including gene panels; biochemical; radiologic; or, other test type) | Trio exome sequencing    | Multidisciplinary approach             | N/A                                                                                                                                   | 1                   | Limited further diagnostic work and provided specific genes for further follow-up.                                            |
| Recurrent autoimmune thrombocytopenic purpura                                   | None      | None                     | Diagnosis made primarily on clinical grounds, including aggregate assessment of non-specific test result                             | Quad exome sequencing    | Re-evaluation of clinical data         | N/A                                                                                                                                   | 1                   | None                                                                                                                          |
| Mitochondrial DNA depletion syndrome, Primary progressive multiple sclerosis    | POLG      | Proband exome sequencing | Diagnosis made primarily on clinical grounds, including aggregate assessment of non-specific test result                             | Proband exome sequencing | Multidisciplinary approach             | Connection of DNA variation to disorder is challenging.                                                                               | 2                   | Initiation of new therapy (Idebenone) and mitochondrial disease support (mitochondrial cocktail), increase carbodopa/levodopa |
| Kohlschütter-Tonz syndrome                                                      | ROGDI     | None                     | Genome-scale sequencing including genome sequencing and exome sequencing                                                             | Quad exome sequencing    | Research sequencing analysis           | N/A                                                                                                                                   | 1                   | Recurrence risk & family planning; management information                                                                     |
| Peroxisome biogenesis disorder 14B                                              | PEX11B    | None                     | Genome-scale sequencing including genome sequencing and exome sequencing                                                             | Quintet exome sequencing | Research sequencing analysis           | N/A                                                                                                                                   | 1                   | Recurrence risk and family planning, management information                                                                   |

| Diagnosis name                                                     | Gene name | Prior sequencing | Chief method used to achieve diagnosis                                                                                               | Type of UDN sequencing    | Keys to making diagnosis                                   | If diagnosis made on re-analysis of existing data, was the variant missed before or was the disease association not known previously? | Diagnosis category* | Brief description of management change                                                                                        |
|--------------------------------------------------------------------|-----------|------------------|--------------------------------------------------------------------------------------------------------------------------------------|---------------------------|------------------------------------------------------------|---------------------------------------------------------------------------------------------------------------------------------------|---------------------|-------------------------------------------------------------------------------------------------------------------------------|
| Necrotizing myopathy due to anti-HMGCR antibodies                  | None      | None             | Diagnosis made primarily on clinical grounds, including aggregate assessment of non-specific test result                             | Duo genome sequencing     | Multidisciplinary approach; team expertise                 | N/A                                                                                                                                   | 1                   | Prognostication, management, recurrence risk                                                                                  |
| Basal ganglia calcification, idiopathic, 1 (formerly Fahr disease) | SLC20A2   | None             | Genome-scale sequencing including genome sequencing and exome sequencing                                                             | Proband exome sequencing  | Multidisciplinary approach; team expertise; sequencing     | N/A                                                                                                                                   | 1                   | Recurrence risk and family planning                                                                                           |
| Congenital prion disease                                           | PRNP      | None             | Directed clinical testing based on phenotype (may be molecular, including gene panels; biochemical; radiologic; or, other test type) | Proband exome sequencing  | Re-evaluation of clinical data; team expertise; sequencing | N/A                                                                                                                                   | 1                   | Recurrence risk and family planning                                                                                           |
| Multiple sclerosis                                                 | None      | None             | Diagnosis made primarily on clinical grounds, including aggregate assessment of non-specific test result                             | None                      | Re-evaluation of clinical data; team expertise             | N/A                                                                                                                                   | 1                   | Initiation of disease modifying therapy (vitamin D supplementation, vitamin B12 supplementation, metronidazole topical cream) |
| Hypotonia, ataxia, and delayed development syndrome                | EBF3      | None             | Genome-scale sequencing including genome sequencing and exome sequencing                                                             | None                      | Re-evaluation of clinical data; sequencing; matchmaking    | N/A                                                                                                                                   | 4                   | Medical management, recurrence risk and family planning                                                                       |
| Action myoclonus-renal failure syndrome                            | SCARB2    | None             | Directed clinical testing based on phenotype (may be molecular, including gene panels; biochemical; radiologic; or, other test type) | None                      | Multidisciplinary approach; team expertise; sequencing     | N/A                                                                                                                                   | 1                   | Recurrence risk, family planning, prognostic information                                                                      |
| Hughes-Stovin syndrome                                             | None      | None             | Diagnosis made primarily on clinical grounds, including aggregate assessment of non-specific test result                             | Trio exome sequencing     | Multidisciplinary approach; team expertise                 | N/A                                                                                                                                   | 1                   | Initiation of proper precautions and therapy (Xarelto)                                                                        |
| Leukoencephalopathy, brain calcifications, and cysts               | SNORD118  | None             | Genome-scale sequencing including genome sequencing and exome sequencing                                                             | Quintet genome sequencing | Multidisciplinary approach; team expertise; sequencing     | N/A                                                                                                                                   | 1                   | Recurrence risk and family planning                                                                                           |
| Kleefstra syndrome                                                 | EHMT1     | None             | Genome-scale sequencing including genome sequencing and exome sequencing                                                             | Quad exome sequencing     | Multidisciplinary approach; team expertise; sequencing     | N/A                                                                                                                                   | 1                   | Change in management                                                                                                          |
| Basal cell nevus syndrome                                          | PTCH1     | None             | Genome-scale sequencing including genome sequencing and exome sequencing                                                             | Trio exome sequencing     | Multidisciplinary approach; sequencing                     | N/A                                                                                                                                   | 1                   | Management options, screening, family planning                                                                                |

| Diagnosis name                                                            | Gene name | Prior sequencing         | Chief method used to achieve diagnosis                                                                                               | Type of UDN sequencing   | Keys to making diagnosis                               | If diagnosis made on re-analysis of existing data, was the variant missed before or was the disease association not known previously? | Diagnosis category* | Brief description of management change                                                                             |
|---------------------------------------------------------------------------|-----------|--------------------------|--------------------------------------------------------------------------------------------------------------------------------------|--------------------------|--------------------------------------------------------|---------------------------------------------------------------------------------------------------------------------------------------|---------------------|--------------------------------------------------------------------------------------------------------------------|
| Noonan syndrome                                                           | PTPN11    | None                     | Directed clinical testing based on phenotype (may be molecular, including gene panels; biochemical; radiologic; or, other test type) | Quintet exome sequencing | Multidisciplinary approach; sequencing                 | N/A                                                                                                                                   | 1                   | Management of muscle symptoms, recurrence risk and family planning, start vitamin D3                               |
| ARV1-CDG                                                                  | ARV1      | Proband exome sequencing | Genome-scale sequencing including genome sequencing and exome sequencing                                                             | None                     | Multidisciplinary approach; team expertise             | Connection to disorder is challenging.                                                                                                | 1                   | Recurrence risk, family planning                                                                                   |
| Non-TB mycobacterial infection                                            | None      | None                     | Diagnosis made primarily on clinical grounds, including aggregate assessment of non-specific test result                             | None                     | Multidisciplinary approach; team expertise             | N/A                                                                                                                                   | 1                   | Initiation of proper therapy (Levaquin, azithromycin)                                                              |
| Poretti-Boltshauser syndrome                                              | LAMA1     | Quintet exome sequencing | Directed clinical testing based on phenotype (may be molecular, including gene panels; biochemical; radiologic; or, other test type) | None                     | Multidisciplinary approach; team expertise             | N/A                                                                                                                                   | 1                   | Genetic counseling and reduction of future aggressive diagnostic testing                                           |
| PURA Syndrome                                                             | PURA      | None                     | Genome-scale sequencing including genome sequencing and exome sequencing                                                             | Quad genome sequencing   | Multidisciplinary approach; team expertise             | N/A                                                                                                                                   | 1                   | None                                                                                                               |
| Neurodevelopmental disorder with hypotonia, seizures, and absent language | HECW2     | None                     | Genome-scale sequencing including genome sequencing and exome sequencing                                                             | None                     | Multidisciplinary approach; team expertise; sequencing | N/A                                                                                                                                   | 1                   | Genetic counseling and reduction of future aggressive diagnostic testing                                           |
| Hypercoagulable state secondary to prothrombin mutation                   | F2        | None                     | Genome-scale sequencing including genome sequencing and exome sequencing                                                             | None                     | Re-evaluation of clinical data                         | Essentially confirmation of a pre-existing diagnosis.                                                                                 | 1                   | Genetic counseling, recurrence risk                                                                                |
| Pontocerebellar hypoplasia, type 6                                        | RARS2     | None                     | Genome-scale sequencing including genome sequencing and exome sequencing                                                             | Quad exome sequencing    | Sequencing                                             | N/A                                                                                                                                   | 1                   | Family specific genetic counseling for family planning                                                             |
| Pseudohypoparathyroidism 1b                                               | GNAS      | None                     | Directed clinical testing based on phenotype (may be molecular, including gene panels; biochemical; radiologic; or, other test type) | Trio exome sequencing    | Targeted genetic testing                               | N/A                                                                                                                                   | 1                   | Family specific counseling for sporadic condition                                                                  |
| Coffin-Siris syndrome 1                                                   | ARID1B    | Trio exome sequencing    | Genome-scale sequencing including genome sequencing and exome sequencing                                                             | Trio genome sequencing   | Research sequencing analysis                           | N/A                                                                                                                                   | 1                   | Referral to specialists for diagnosis-specific evaluations; Family specific genetic counseling for family planning |



| Diagnosis name                                                                                                  | Gene name   | Prior sequencing         | Chief method used to achieve diagnosis                                                                                               | Type of UDN sequencing | Keys to making diagnosis                                                                         | If diagnosis made on re-analysis of existing data, was the variant missed before or was the disease association not known previously?        | Diagnosis category* | Brief description of management change                                                  |
|-----------------------------------------------------------------------------------------------------------------|-------------|--------------------------|--------------------------------------------------------------------------------------------------------------------------------------|------------------------|--------------------------------------------------------------------------------------------------|----------------------------------------------------------------------------------------------------------------------------------------------|---------------------|-----------------------------------------------------------------------------------------|
| Epilepsy-aphasia syndrome                                                                                       | GRIN2A      | None                     | Genome-scale sequencing including genome sequencing and exome sequencing                                                             | Quad exome sequencing  | Including additional family members; research sequencing analysis                                | N/A                                                                                                                                          | 1                   | Family specific genetic counseling for family planning                                  |
| Mitochondrial complex V deficiency, Nuclear type 5 (MC5DN5)                                                     | ATP5D       | Proband exome sequencing | Genome-scale sequencing including genome sequencing and exome sequencing                                                             | None                   | Research sequencing analysis; basic research (fibroblast studies, model organisms, metabolomics) | Novel gene-disease association was established by UDN team. Variants were missed on prior sequencing due to lack of gene-disease association | 4                   | Family specific genetic counseling for family planning                                  |
| Epileptic encephalopathy, early infantile, 33                                                                   | EEF1A2      | None                     | Genome-scale sequencing including genome sequencing and exome sequencing                                                             | Trio exome sequencing  | Including additional family members; sequencing                                                  | N/A                                                                                                                                          | 1                   | Referral to specialists for diagnosis-specific evaluations                              |
| Metabolic encephalomyopathic crises, recurrent, with rhabdomyolysis, cardiac arrhythmias, and neurodegeneration | TANGO2      | None                     | Genome-scale sequencing including genome sequencing and exome sequencing                                                             | Trio exome sequencing  | Timing; sequencing                                                                               | N/A                                                                                                                                          | 1                   | Referral to specialists for diagnosis-specific evaluations, ongoing cardiac monitoring  |
| Sjogren syndrome; AL amyloidosis; inclusion body myositis                                                       | None        | None                     | Directed clinical testing based on phenotype (may be molecular, including gene panels; biochemical; radiologic; or, other test type) | Trio exome sequencing  | Multidisciplinary approach                                                                       | N/A                                                                                                                                          | 2                   | Referral to specialists appropriate for medical management and treatment of amyloidosis |
| Epileptic encephalopathy, early infantile, 47 (EIEE47)                                                          | FGF12       | None                     | Genome-scale sequencing including genome sequencing and exome sequencing                                                             | Trio exome sequencing  | Sequencing                                                                                       | N/A                                                                                                                                          | 1                   | Family specific genetic counseling                                                      |
| FOXG1 syndrome/congenital variant of Rett syndrome                                                              | FOXG1       | None                     | Genome-scale sequencing including genome sequencing and exome sequencing                                                             | Trio exome sequencing  | Sequencing; multidisciplinary approach                                                           | N/A                                                                                                                                          | 1                   | Referral to specialists based on genetic results                                        |
| Marfan syndrome; Trichorhinophalangeal syndrome                                                                 | FBN1, TRPS1 | None                     | Genome-scale sequencing including genome sequencing and exome sequencing                                                             | Trio exome sequencing  | Sequencing                                                                                       | N/A                                                                                                                                          | 2                   | Referral to specialists for long-term follow-up                                         |
| Epileptic encephalopathy, early infantile, 36                                                                   | ALG13       | None                     | Genome-scale sequencing including genome sequencing and exome sequencing                                                             | Quad exome sequencing  | Sequencing                                                                                       | N/A                                                                                                                                          | 1                   | Referred to additional research studies (including sharing of patient samples)          |
| Mosaic GNAQ-related disorder                                                                                    | GNAQ        | None                     | Genome-scale sequencing including genome sequencing and exome sequencing                                                             | Trio exome sequencing  | Team expertise; targeted genetic testing                                                         | N/A                                                                                                                                          | 1                   | Referral to specialists appropriate for molecular diagnosis                             |

| Diagnosis name                                                                    | Gene name | Prior sequencing      | Chief method used to achieve diagnosis                                                                                               | Type of UDN sequencing | Keys to making diagnosis                         | If diagnosis made on re-analysis of existing data, was the variant missed before or was the disease association not known previously? | Diagnosis category* | Brief description of management change                                                           |
|-----------------------------------------------------------------------------------|-----------|-----------------------|--------------------------------------------------------------------------------------------------------------------------------------|------------------------|--------------------------------------------------|---------------------------------------------------------------------------------------------------------------------------------------|---------------------|--------------------------------------------------------------------------------------------------|
| Progressive myoclonic epilepsy type 3                                             | KCTD7     | None                  | Genome-scale sequencing including genome sequencing and exome sequencing                                                             | Quad exome sequencing  | Re-evaluation of sequencing data; RNA sequencing | N/A                                                                                                                                   | 1                   | Family specific genetic counseling for family planning                                           |
| Mental retardation, autosomal dominant 13                                         | DYNC1H1   | None                  | Genome-scale sequencing including genome sequencing and exome sequencing                                                             | Trio exome sequencing  | Sequencing                                       | N/A                                                                                                                                   | 1                   | Referral to specialists based on molecular diagnosis                                             |
| Schnitzler syndrome                                                               | None      | None                  | Diagnosis made primarily on clinical grounds, including aggregate assessment of non-specific test result                             | None                   | Team expertise; multidisciplinary approach       | N/A                                                                                                                                   | 1                   | Directed clinical treatment (new medication) ((actemra (tocilizumab))                            |
| Neurodevelopmental disorder with or without anomalies of the brain, eye, or heart | RERE      | None                  | Genome-scale sequencing including genome sequencing and exome sequencing                                                             | Trio exome sequencing  | Timing                                           | N/A                                                                                                                                   | 1                   | Referral to specialists for diagnosis-specific evaluation                                        |
| TRIP12 associated autism with facial dysmorphism                                  | TRIP12    | Trio exome sequencing | Genome-scale sequencing including genome sequencing and exome sequencing                                                             | Trio genome sequencing | Timing                                           | N/A                                                                                                                                   | 4                   | Recommendations for medical surveillance for additional symptoms that may manifest later in life |
| Hypotonia, infantile, with psychomotor retardation and characteristic facies 2    | UNC80     | Trio exome sequencing | Genome-scale sequencing including genome sequencing and exome sequencing                                                             | None                   | Timing; research sequencing analysis             | Disease association not previously known.                                                                                             | 1                   | No change in medical management                                                                  |
| Achalasia-addisonianism-alacrima syndrome (AAAS)                                  | AAAS      | Trio exome sequencing | Directed clinical testing based on phenotype (may be molecular, including gene panels; biochemical; radiologic; or, other test type) | Trio genome sequencing | Multidisciplinary approach                       | N/A                                                                                                                                   | 1                   | No change in medical management                                                                  |
| Primary ciliary dyskinesia, 7                                                     | DNAH11    | None                  | Genome-scale sequencing including genome sequencing and exome sequencing                                                             | Trio exome sequencing  | Sequencing                                       | N/A                                                                                                                                   | 1                   | Recommendations to alter exposures to allergens and referral to regional center studying disease |
| Schaaf-Yang syndrome                                                              | MAGEL2    | Trio exome sequencing | Genome-scale sequencing including genome sequencing and exome sequencing                                                             | Trio genome sequencing | Timing                                           | N/A                                                                                                                                   | 1                   | Connection with research group studying disease                                                  |
| IRF2BPL-related condition                                                         | IRF2BPL   | Trio exome sequencing | Genome-scale sequencing including genome sequencing and exome sequencing                                                             | None                   | Matchmaking                                      | Disease association not previously known.                                                                                             | 4                   | No change in medical management                                                                  |
| Pseudopseudohypoparathyroidism                                                    | GNAS      | None                  | Genome-scale sequencing including genome sequencing and exome sequencing                                                             | Trio exome sequencing  | Sequencing; research sequencing analysis         | N/A                                                                                                                                   | 1                   | Recommendations for altering lifestyle to prevent exacerbation of symptoms                       |

| Diagnosis name                                                          | Gene name  | Prior sequencing         | Chief method used to achieve diagnosis                                                                                               | Type of UDN sequencing                           | Keys to making diagnosis                                                      | If diagnosis made on re-analysis of existing data, was the variant missed before or was the disease association not known previously? | Diagnosis category* | Brief description of management change                                                                |
|-------------------------------------------------------------------------|------------|--------------------------|--------------------------------------------------------------------------------------------------------------------------------------|--------------------------------------------------|-------------------------------------------------------------------------------|---------------------------------------------------------------------------------------------------------------------------------------|---------------------|-------------------------------------------------------------------------------------------------------|
| Congenital disorder of glycosylation type 2m                            | SLC35A2    | Trio exome sequencing    | Genome-scale sequencing including genome sequencing and exome sequencing                                                             | Trio genome sequencing                           | Research sequencing analysis; basic research                                  | N/A                                                                                                                                   | 1                   | Referred to NIH congenital disorders of glycosylation protocol for evaluation of potential treatments |
| IRF2BPL-related condition                                               | IRF2BPL    | None                     | Genome-scale sequencing including genome sequencing and exome sequencing                                                             | Trio exome sequencing                            | Sequencing; matchmaking                                                       | N/A                                                                                                                                   | 4                   | Referral to specialists based on molecular diagnosis                                                  |
| Spinal muscular atrophy, lower extremity-predominant 1                  | DYNC1H1    | Proband exome sequencing | Genome-scale sequencing including genome sequencing and exome sequencing                                                             | Quintet genome sequencing                        | Including additional family members; sequencing; research sequencing analysis | N/A                                                                                                                                   | 2                   | No change in medical management                                                                       |
| Floating-Harbor syndrome                                                | SRCAP      | None                     | Genome-scale sequencing including genome sequencing and exome sequencing                                                             | Trio exome sequencing                            | Sequencing                                                                    | N/A                                                                                                                                   | 1                   | No change in medical management                                                                       |
| Myofibrillar myopathy 8                                                 | PYROXD1    | Proband exome sequencing | Genome-scale sequencing including genome sequencing and exome sequencing                                                             | Quad genome sequencing                           | Including additional family members; timing                                   | N/A                                                                                                                                   | 1                   | No change in medical management                                                                       |
| Severe progeria secondary to mosaicism for ZMPSTE24 frameshift mutation | ZMPSTE24   | None                     | Genome-scale sequencing including genome sequencing and exome sequencing                                                             | Sextet exome sequencing                          | Targeted genetic testing                                                      | N/A                                                                                                                                   | 2                   | Pravastatin and bisphosphonate                                                                        |
| Coffin-Siris syndrome 1                                                 | ARID1B     | None                     | Genome-scale sequencing including genome sequencing and exome sequencing                                                             | Quad exome sequencing                            | Sequencing                                                                    | N/A                                                                                                                                   | 2                   | No specific therapy; care plan suggested                                                              |
| Congenital disorder of glycosylation                                    | COG4       | None                     | Genome-scale sequencing including genome sequencing and exome sequencing                                                             | Trio exome sequencing, Proband genome sequencing | Matchmaking; basic research (model organism)                                  | N/A                                                                                                                                   | 4                   | Referred to NIH CDG protocol for evaluation of potential treatments                                   |
| IgG4-related condition                                                  | None       | None                     | Directed clinical testing based on phenotype (may be molecular, including gene panels; biochemical; radiologic; or, other test type) | Septet genome sequencing                         | Clinical testing                                                              | N/A                                                                                                                                   | 1                   | Rituximab                                                                                             |
| Diploid-triploid mosaicism; Van Maldergem syndrome 2                    | None, FAT4 | None                     | Genome-scale sequencing including genome sequencing and exome sequencing                                                             | Trio genome sequencing                           | Team expertise; sequencing and karyotype (fibroblast DNA)                     | N/A                                                                                                                                   | 1                   | No specific therapy; care plan suggested                                                              |
| Senior-Loken syndrome 5                                                 | IQCB1      | None                     | Genome-scale sequencing including genome sequencing and exome sequencing                                                             | Quad genome sequencing                           | Sequencing                                                                    | N/A                                                                                                                                   | 1                   | No specific therapy; care plan suggested                                                              |

| Diagnosis name                                  | Gene name | Prior sequencing      | Chief method used to achieve diagnosis                                                                   | Type of UDN sequencing    | Keys to making diagnosis                                                 | If diagnosis made on re-analysis of existing data, was the variant missed before or was the disease association not known previously?                                                                                                               | Diagnosis category* | Brief description of management change                                                    |
|-------------------------------------------------|-----------|-----------------------|----------------------------------------------------------------------------------------------------------|---------------------------|--------------------------------------------------------------------------|-----------------------------------------------------------------------------------------------------------------------------------------------------------------------------------------------------------------------------------------------------|---------------------|-------------------------------------------------------------------------------------------|
| Charcot-Marie-Tooth disease, axonal, type 2s    | IGHMBP2   | Trio exome sequencing | Genome-scale sequencing including genome sequencing and exome sequencing                                 | Trio genome sequencing    | Research sequencing analysis                                             | Reanalysis of existing whole exome data identified the VUS to be an excellent fit with the patient's phenotype. This led to genome sequence identification of the non-coding variant in trans whose proven effect on function led to the diagnosis. | 2                   | No specific therapy; referred back to specialist in management of neuromuscular disorders |
| Primary pulmonology hypertension                | ENG       | None                  | Genome-scale sequencing including genome sequencing and exome sequencing                                 | Proband genome sequencing | Reanalysis of biopsies; research sequencing analysis; basic research     | N/A                                                                                                                                                                                                                                                 | 1                   | Hydroxychloroquine and methotrexate                                                       |
| Brown-Vialetto-Van Laere syndrome 1             | None      | None                  | Diagnosis made primarily on clinical grounds, including aggregate assessment of non-specific test result | Trio genome sequencing    | Research sequencing analysis; multidisciplinary approach                 | N/A                                                                                                                                                                                                                                                 | 2                   | Pharmacologic doses of riboflavin                                                         |
| Limb-girdle muscular dystrophy, type 2          | TOR1AIP1  | None                  | Genome-scale sequencing including genome sequencing and exome sequencing                                 | Trio genome sequencing    | Multidisciplinary approach; research sequencing analysis; basic research | N/A                                                                                                                                                                                                                                                 | 2                   | No specific change. Patient referred back to neurologist.                                 |
| Wieacker-Wolff syndrome                         | ZC4H2     | Trio exome sequencing | Non-sequencing, genome-wide diagnostic assay (for example, SNP array, oligo array or karyotype)          | Quad genome sequencing    | Targeted genetic testing                                                 | N/A                                                                                                                                                                                                                                                 | 1                   | No specific change                                                                        |
| Familial cold-induced autoinflammatory syndrome | NLRP3     | None                  | Genome-scale sequencing including genome sequencing and exome sequencing                                 | Sextet exome sequencing   | Research sequencing analysis; multidisciplinary approach                 | N/A                                                                                                                                                                                                                                                 | 2                   | Treatment (Anakinra) responsive (alleviated symptoms)                                     |
| NADK2 deficiency                                | NADK2     | None                  | Genome-scale sequencing including genome sequencing and exome sequencing                                 | Quintet genome sequencing | Multidisciplinary approach; research sequencing analysis; basic research | N/A                                                                                                                                                                                                                                                 | 3                   | NADPH substrate trial                                                                     |
| Paraganglioma                                   | SDHD      | None                  | Genome-scale sequencing including genome sequencing and exome sequencing                                 | Trio genome sequencing    | Multidisciplinary approach; research sequencing analysis                 | N/A                                                                                                                                                                                                                                                 | 1                   | Referred to NIH paraganglioma protocol for evaluation, monitoring and potential treatment |
| Congenital disorder of glycosylation, type 1k   | ALG1      | Trio exome sequencing | Genome-scale sequencing including genome sequencing and exome sequencing                                 | Trio genome sequencing    | Research analysis                                                        | Diagnosis should have been made with prior sequencing, but sequencing was of poor quality in the critical regions.                                                                                                                                  | 1                   | No specific change. Patient referred back to his metabolic physician                      |
| GTP cyclohydrolase I deficiency                 | GCH1      | None                  | Genome-scale sequencing including genome sequencing and exome sequencing                                 | Quad exome sequencing     | Research analysis                                                        | N/A                                                                                                                                                                                                                                                 | 2                   | Therapy responsive (Dopa/Carbidopa)                                                       |

| Diagnosis name                      | Gene name                            | Prior sequencing         | Chief method used to achieve diagnosis                                                                   | Type of UDN sequencing    | Keys to making diagnosis                                 | If diagnosis made on re-analysis of existing data, was the variant missed before or was the disease association not known previously? | Diagnosis category* | Brief description of management change                                                                                                                                                                                                                                                          |
|-------------------------------------|--------------------------------------|--------------------------|----------------------------------------------------------------------------------------------------------|---------------------------|----------------------------------------------------------|---------------------------------------------------------------------------------------------------------------------------------------|---------------------|-------------------------------------------------------------------------------------------------------------------------------------------------------------------------------------------------------------------------------------------------------------------------------------------------|
| Stormorken syndrome                 | STIM1                                | None                     | Genome-scale sequencing including genome sequencing and exome sequencing                                 | Trio exome sequencing     | Multidisciplinary approach; research sequencing analysis | N/A                                                                                                                                   | 2                   | Key:<br>1 known syndrome<br>2 unusual presentation of                                                                                                                                                                                                                                           |
| ABCA2-related condition             | ABCA2                                | None                     | Genome-scale sequencing including genome sequencing and exome sequencing                                 | Trio genome sequencing    | Research sequencing analysis                             | N/A                                                                                                                                   | 3                   | 1 known syndrome<br>3 known gene/region but new syndrome<br>4 new gene/region,                                                                                                                                                                                                                  |
| GLYR1-related condition             | GLYR1                                | None                     | Genome-scale sequencing including genome sequencing and exome sequencing                                 | Trio genome sequencing    | Research sequencing analysis                             | N/A                                                                                                                                   | 3                   | new syndrome                                                                                                                                                                                                                                                                                    |
| SNAPC4-related inflammatory disease | SNAPC4                               | None                     | Genome-scale sequencing including genome sequencing and exome sequencing                                 | Trio genome sequencing    | Research sequencing analysis                             | N/A                                                                                                                                   | 3                   | None                                                                                                                                                                                                                                                                                            |
| Novel cardiac syndrome              | F5, PROZ, SERPINA10, SERPINA1, PRKG1 | Proband exome sequencing | Genome-scale sequencing including genome sequencing and exome sequencing                                 | Proband genome sequencing | Research sequencing analysis                             |                                                                                                                                       | 3                   | None                                                                                                                                                                                                                                                                                            |
| Exercise-induced hyperuricemia      | None                                 | None                     | Diagnosis made primarily on clinical grounds, including aggregate assessment of non-specific test result | Trio exome sequencing     | Phenotyping                                              | N/A                                                                                                                                   | 1                   | The patient has been treated with Febuxostat. This treatment has successfully managed his symptoms and prevented any further episodes of hyperuricemia, even when an episode was provoked through rigorous stress testing (which had previously been able to induce episodes of hyperuricemia). |
| TMEM94-related condition            | TMEM94                               | Proband exome sequencing | Genome-scale sequencing including genome sequencing and exome sequencing                                 | Duo genome sequencing     | Matchmaking                                              | N/A                                                                                                                                   | 4                   | None                                                                                                                                                                                                                                                                                            |
| Myopathy, mitochondrial, and ataxia | MSTO1                                | Proband exome sequencing | Genome-scale sequencing including genome sequencing and exome sequencing                                 | Trio genome sequencing    | Reanalysis of prior sequencing data; timing              | Disease was not previously known                                                                                                      | 1                   | Referred to appropriate specialist for regular follow-up; implications for family planning                                                                                                                                                                                                      |
| SPI1-related condition              | SPI1                                 | None                     | Genome-scale sequencing including genome sequencing and exome sequencing                                 | Duo genome sequencing     | Research sequencing analysis                             | N/A                                                                                                                                   | 3                   | None                                                                                                                                                                                                                                                                                            |
| EVIS-related condition              | EVIS                                 | None                     | Genome-scale sequencing including genome sequencing and exome sequencing                                 | Duo genome sequencing     | Research sequencing analysis                             | N/A                                                                                                                                   | 3                   | None                                                                                                                                                                                                                                                                                            |

\*Key:  
1 known syndrome  
2 unusual presentation of known syndrome  
3 known gene/region but new syndrome  
4 new gene/region, new syndrome

**Table S3. Details of UDN evaluation**

|    | <b>Specialties consulted during in-person evaluation</b>                                                                                             | <b>Tests performed as part of in-person evaluation</b>                                                                                                                                                                                                                                                                               |
|----|------------------------------------------------------------------------------------------------------------------------------------------------------|--------------------------------------------------------------------------------------------------------------------------------------------------------------------------------------------------------------------------------------------------------------------------------------------------------------------------------------|
| 1  | Acupuncture, endocrinology, neurophysiology, ophthalmology                                                                                           | Electromyography/nerve conduction velocity, echocardiogram, electrocardiogram, computed tomography scan (cerebrum/chest/abdomen/pelvis/femur/foot/humerus/neck/radius/ulna/tibia/fibula), magnetic resonance imaging (brain), ultrasound (carotid/abdomen), bone densitometry (femur/radius/spine), lumbar puncture, skeletal survey |
| 2  | Genetics                                                                                                                                             | Skin biopsy                                                                                                                                                                                                                                                                                                                          |
| 3  | Genetics, immunology, infectious disease, rheumatology                                                                                               | Complete blood count, chromosomal microarray, computed tomography scan (chest), immunology labs, infectious disease studies                                                                                                                                                                                                          |
| 4  | Audiology, dentistry, endocrinology, genetics, neuropsychology, nutrition, occupational therapy, ophthalmology, physiatry, physical therapy          | Electromyography/nerve conduction velocity, echocardiogram, electrocardiogram, ultrasound (abdomen), computed tomography scan (craniofacial), swallow study, skeletal survey                                                                                                                                                         |
| 5  | Audiology, dentistry, endocrinology, neurodevelopment, neuropsychology, occupational therapy, physiatry, physical therapy                            | Bone age, electromyography/nerve conduction velocity, electroencephalography, magnetic resonance imaging/magnetic resonance spectroscopy (brain)                                                                                                                                                                                     |
| 6  | Neurodevelopment, ophthalmology, psychiatry                                                                                                          | Sleep study, electroencephalography, electroencephalography-evoked potential, electrocardiogram, echocardiogram, ultrasound (abdomen)                                                                                                                                                                                                |
| 7  | Neuropsychology, ophthalmology, pain and palliative care                                                                                             | Autonomic nervous system testing, bone densitometry (femur/radius/spine), computed tomography scan (cerebrum/chest/abdomen/pelvis/femur/foot/humerus/cervical spine/radius/ulna/tibia/fibula), echocardiogram, electrocardiogram, electromyography/nerve conduction velocity, lumbar puncture, magnetic resonance imaging (brain)    |
| 8  | Genetics, neurology                                                                                                                                  | Ultrasound (abdomen)                                                                                                                                                                                                                                                                                                                 |
| 9  | Immunology, genetics                                                                                                                                 | Exon-level microarray on fibroblasts, immunology labs, karyotype, targeted genetic testing on fibroblasts                                                                                                                                                                                                                            |
| 10 | Dentistry, endocrinology, gastroenterology, neurodevelopment, neurology, nutrition, occupational therapy, ophthalmology, physiatry, physical therapy | Electrocardiogram, echocardiogram, sleep study, electroencephalography, electromyography/nerve conduction velocity, autonomic nervous system testing                                                                                                                                                                                 |
| 11 | Genetics, neuromuscular, neuropsychology                                                                                                             | None                                                                                                                                                                                                                                                                                                                                 |
| 12 | Genetics, neurology, surgery                                                                                                                         | Chromosomal microarray, creatine kinase, liver function tests, metabolomics, muscle biopsy                                                                                                                                                                                                                                           |
| 13 | Genetics, neurology, radiology                                                                                                                       | Antibody testing                                                                                                                                                                                                                                                                                                                     |
| 14 | Genetics, neuromuscular, ophthalmology                                                                                                               | Creatine kinase, metabolic labs                                                                                                                                                                                                                                                                                                      |
| 15 | Cardiology, endocrinology, ophthalmology                                                                                                             | Electromyography/nerve conduction velocity, pulmonary function tests, echocardiogram, electrocardiogram, ultrasound (liver), magnetic resonance imaging (brain), computed tomography angiography (abdomen/aorta)                                                                                                                     |
| 16 | Audiology, dentistry, genetics, neurodevelopment, neurology, neurosurgery, ophthalmology, orthopedics, radiology                                     | Research labs, skeletal survey                                                                                                                                                                                                                                                                                                       |
| 17 | Allergy and immunology, dentistry, dermatology, occupational therapy, physiatry, physical therapy, pulmonology                                       | Pulmonary function tests, echocardiogram, ultrasound (neck/soft tissues), computed tomography scan (chest/lung)                                                                                                                                                                                                                      |
| 18 | Audiology, cardiology, gastroenterology, genetics, immunology, neurodevelopment, neurology, nephrology, ophthalmology, otolaryngology, pulmonology   | Echocardiogram, electrocardiogram, electromyography, fibroblast culture, magnetic resonance imaging (brain/spine), research labs, skeletal survey                                                                                                                                                                                    |
| 19 | Genetics, immunology, neurology                                                                                                                      | Immunology labs, hematology studies, lumbar puncture, metabolic labs                                                                                                                                                                                                                                                                 |
| 20 | Cardiology, radiology                                                                                                                                | Magnetic resonance angiogram (neck/chest/abdomen), ultrasound (lower extremity), echocardiogram                                                                                                                                                                                                                                      |
| 21 | Gastroenterology, genetics, radiology                                                                                                                | Gastrointestinal testing                                                                                                                                                                                                                                                                                                             |
| 22 | Internal medicine, nephrology                                                                                                                        | Metabolomics, skin biopsy                                                                                                                                                                                                                                                                                                            |
| 23 | Audiology, cardiology, genetics, neurodevelopment, neurology, ophthalmology, otolaryngology, pulmonology                                             | Echocardiogram, electrocardiogram, fibroblast culture, research labs                                                                                                                                                                                                                                                                 |

|    |                                                                                                                                         |                                                                                                                                                                                                                                      |
|----|-----------------------------------------------------------------------------------------------------------------------------------------|--------------------------------------------------------------------------------------------------------------------------------------------------------------------------------------------------------------------------------------|
| 24 | Cardiology, ophthalmology                                                                                                               | Electrocardiogram, echocardiogram, computed tomography angiography (abdomen/thoracic aorta), computed tomography scan (cerebrum/neck/abdomen/pelvis/femur/foot/tibia/fibula), ultrasound (renal), electrocardiogram, skeletal survey |
| 25 | Genetics, neurology, neuropsychology, ophthalmology                                                                                     | Creatine kinase, electroencephalography, metabolic labs                                                                                                                                                                              |
| 26 | Nephrology, ophthalmology                                                                                                               | Electrocardiogram, echocardiogram, bone age, x-ray (knees)                                                                                                                                                                           |
| 27 | Genetics, immunology, neurology, neuropsychology                                                                                        | Echocardiogram, electrocardiogram, fibroblast culture, immunology labs, research labs                                                                                                                                                |
| 28 | Cardiology, genetics, hematology, immunology                                                                                            | Antibody testing, clotting labs, computed tomography scan (chest), echocardiogram, immunology labs, metabolic labs, hematology studies, rheumatology labs, targeted genetic testing                                                  |
| 29 | Genetics, immunology, infectious disease, neuroimmunology, ophthalmology                                                                | Electromyography, immunology labs                                                                                                                                                                                                    |
| 30 | Genetics, neurology, neuropsychology                                                                                                    | Electroencephalography, skeletal survey                                                                                                                                                                                              |
| 31 | Genetics, neurology, surgery                                                                                                            | Metabolomics, mitochondrial studies, muscle biopsy, targeted genetic testing                                                                                                                                                         |
| 32 | Clinical pharmacology, dermatology, endocrinology, genetics                                                                             | Complete blood count, lipid panel, liver function tests, metabolic labs, skeletal survey                                                                                                                                             |
| 33 | Acupuncture, dermatology, endocrinology, occupational therapy, ophthalmology, physiatry, physical therapy, rheumatology                 | Skeletal survey, bone scan, nerve conduction velocity                                                                                                                                                                                |
| 34 | Bioethics, nutrition, occupational therapy, ophthalmology, physiatry, physical therapy                                                  | DaTscan, electrocardiogram, electroencephalography, lumbar puncture, magnetic resonance imaging (brain), nerve conduction velocity, ultrasound (abdomen)                                                                             |
| 35 | Endocrinology, gastroenterology, immunology, otolaryngology, rheumatology                                                               | Colonoscopy, computed tomography scan (sinus), immunology labs                                                                                                                                                                       |
| 36 | Genetics                                                                                                                                | None                                                                                                                                                                                                                                 |
| 37 | Genetics, neurology                                                                                                                     | Liver function tests                                                                                                                                                                                                                 |
| 38 | Audiology, clinical pharmacology, genetics, neurodevelopment, neurology, ophthalmology                                                  | Congenital disorders of glycosylation testing, magnetic resonance spectroscopy (cerebellum), metabolic labs, targeted genetic testing                                                                                                |
| 39 | Genetics                                                                                                                                | immunology labs                                                                                                                                                                                                                      |
| 40 | Internal medicine                                                                                                                       | immunology labs, metabolomics, RNA sequencing, skin biopsy                                                                                                                                                                           |
| 41 | Genetics, neuropsychology, ophthalmology                                                                                                | Muscle biopsy                                                                                                                                                                                                                        |
| 42 | Audiology, genetics, neuroradiology, neuropathology, ophthalmology                                                                      | Magnetic resonance imaging (brain)                                                                                                                                                                                                   |
| 43 | Genetics                                                                                                                                | None                                                                                                                                                                                                                                 |
| 44 | Audiology, cardiology, endocrinology, genetics, ophthalmology, orthopedics                                                              | Echocardiogram, electrocardiogram, magnetic resonance imaging (cervical spine), x-ray (cervical spine/forearm/elbows/pelvis)                                                                                                         |
| 45 |                                                                                                                                         | Magnetic resonance imaging (spine)                                                                                                                                                                                                   |
| 46 | Internal medicine, rheumatology                                                                                                         | Immunology labs                                                                                                                                                                                                                      |
| 47 | Allergy and immunology, cardiology, pulmonology, rheumatology                                                                           | Bronchoscopy, computed tomography scan (chest), electrocardiogram, positron emission tomography scan (torso), stress echocardiography, x-ray (chest)                                                                                 |
| 48 | Genetics                                                                                                                                | Magnetic resonance imaging (brain), skin biopsy                                                                                                                                                                                      |
| 49 | Cardiology, endocrinology, gastroenterology, genetics, immunology, infectious disease, neurology, nephrology, orthopedics, rheumatology | Echocardiogram, electrocardiogram, endocrine studies, renal function tests, metabolic labs, research labs, x-ray (foot)                                                                                                              |
| 50 | Genetics, neurology, physical therapy, ophthalmology                                                                                    | Magnetic resonance imaging/magnetic resonance spectroscopy (brain), metabolic labs                                                                                                                                                   |
| 51 | Audiology, occupational therapy, ophthalmology, otolaryngology, physiatry, physical therapy, pulmonary                                  | Magnetic resonance imaging (brain), swallow study, lumbar puncture, x-ray (chest), magnetic resonance imaging (cervical spine/thoracic spine/lumbar spine), electrocardiogram, echocardiogram                                        |
| 52 | Occupational therapy, physiatry, physical therapy                                                                                       | Lumbar puncture, magnetic resonance imaging (brain)                                                                                                                                                                                  |
| 53 | Genetics, neurology                                                                                                                     | Targeted genetic testing                                                                                                                                                                                                             |

|    |                                                                                                                                       |                                                                                                                                                                                                                                                                                                                                                                                                                              |
|----|---------------------------------------------------------------------------------------------------------------------------------------|------------------------------------------------------------------------------------------------------------------------------------------------------------------------------------------------------------------------------------------------------------------------------------------------------------------------------------------------------------------------------------------------------------------------------|
| 54 | Gastroenterology, neuropsychology, nutrition, occupational therapy, ophthalmology, psychiatry, physical therapy                       | Bone densitometry (femur), echocardiogram, electrocardiogram, electroencephalography, nerve conduction velocity, skeletal survey, ultrasound (abdomen)                                                                                                                                                                                                                                                                       |
| 55 | Genetics, neurology, neuropsychology, rheumatology                                                                                    | Lumbar puncture, metabolomics, rheumatology labs                                                                                                                                                                                                                                                                                                                                                                             |
| 56 | Genetics, occupational and environmental medicine                                                                                     | Skin biopsy                                                                                                                                                                                                                                                                                                                                                                                                                  |
| 57 | Audiology, dermatology, neuropsychology, occupational therapy, ophthalmology, psychiatry, physical therapy                            | Electromyography/nerve conduction velocity, electroencephalography, electrocardiogram, echocardiogram, ultrasound (abdomen), magnetic resonance imaging (brain)                                                                                                                                                                                                                                                              |
| 58 | Neurology                                                                                                                             | Targeted genetic testing                                                                                                                                                                                                                                                                                                                                                                                                     |
| 59 | Genetics                                                                                                                              | None                                                                                                                                                                                                                                                                                                                                                                                                                         |
| 60 | Allergy and immunology, hematology, rheumatology                                                                                      | Magnetic resonance imaging (brain), computed tomography scan (chest/abdomen), ultrasound (abdomen)                                                                                                                                                                                                                                                                                                                           |
| 61 | Dermatology, genetics, immunology, ophthalmology, pulmonology                                                                         | Antibody testing, complete blood count, immunology labs, infectious disease studies, pulmonary function tests, rheumatology labs, x-ray (chest)                                                                                                                                                                                                                                                                              |
| 62 | Ophthalmology                                                                                                                         | Echocardiogram, electrocardiogram, magnetic resonance imaging (humerus/abdomen/thighs)                                                                                                                                                                                                                                                                                                                                       |
| 63 | Ophthalmology, neuropsychology                                                                                                        | Lumbar puncture, magnetic resonance imaging (brain/cervical spine/thoracic spine), swallow study                                                                                                                                                                                                                                                                                                                             |
| 64 | Gastroenterology, infectious disease, occupational therapy, ophthalmology, psychiatry, physical therapy, speech-language pathology    | Electrocardiogram, electromyography/nerve conduction velocity, electroencephalography, endoscopy, magnetic resonance imaging (brain), lumbar puncture, x-ray (chest)                                                                                                                                                                                                                                                         |
| 65 | Endocrinology, genetics, hematology, immunology                                                                                       | Bone age, metabolic labs, endocrine studies, immunology labs, hematology studies                                                                                                                                                                                                                                                                                                                                             |
| 66 | Audiology, endocrinology, neurology, neuropsychology, occupational therapy, ophthalmology, psychiatry, physical therapy               | Echocardiogram, electromyography/nerve conduction velocity, electrocardiogram, ultrasound (abdomen), magnetic resonance imaging (brain), skeletal survey                                                                                                                                                                                                                                                                     |
| 67 | Genetics, nephrology, ophthalmology                                                                                                   | Complete blood count, electrolytes, kidney function tests, metabolic labs, ultrasound (renal)                                                                                                                                                                                                                                                                                                                                |
| 68 | Neuropsychology, ophthalmology, pain and palliative care                                                                              | Echocardiogram, electromyography/nerve conduction velocity, electroencephalography, electroencephalography-evoked potential, pulmonary function tests, electrocardiogram, ultrasound (renal/abdomen), positron emission tomography scan (brain), bone densitometry (femur/radius/spine), magnetic resonance imaging (pituitary/brain/cervical/thoracic), computed tomography scan (cerebrum/abdomen/pelvis), skeletal survey |
| 69 | Genetics, neuropsychology                                                                                                             | None                                                                                                                                                                                                                                                                                                                                                                                                                         |
| 70 | Genetics, neurology, neuropsychology, ophthalmology                                                                                   | None                                                                                                                                                                                                                                                                                                                                                                                                                         |
| 71 | Genetics, neurology                                                                                                                   | Metabolomics, skin biopsy                                                                                                                                                                                                                                                                                                                                                                                                    |
| 72 | Genetics, neurology, nephrology, orthopedics                                                                                          | Magnetic resonance imaging (brain), research labs                                                                                                                                                                                                                                                                                                                                                                            |
| 73 | Audiology, neuropsychology, occupational therapy, ophthalmology, psychiatry, physical therapy                                         | Autonomic nervous system testing, echocardiogram, electroencephalography, electromyography/nerve conduction velocity, electrocardiogram, ultrasound (abdomen), magnetic resonance imaging (brain/cervical spine/lumbar spine/thoracic spine), swallow study, lumbar puncture                                                                                                                                                 |
| 74 | Hematology, infectious disease, neuropsychology, ophthalmology, pulmonology                                                           | Positron emission tomography scan (torso), magnetic resonance imaging (brain), computed tomography scan (chest/abdomen/pelvis/lung), lumbar puncture                                                                                                                                                                                                                                                                         |
| 75 | Neurology, ophthalmology                                                                                                              | Chromosomal microarray                                                                                                                                                                                                                                                                                                                                                                                                       |
| 76 | Audiology, neuropsychology, occupational therapy, ophthalmology, psychiatry, physical therapy, pulmonology, speech-language pathology | Electromyography/nerve conduction velocity, magnetic resonance imaging (brain), lumbar puncture, swallow study, pulmonary function tests                                                                                                                                                                                                                                                                                     |
| 77 | Audiology, endocrinology, neurology, neuropsychology, occupational therapy, psychiatry, physical therapy, speech-language pathology   | Electromyography/nerve conduction velocity, electroencephalography, electroencephalography-evoked potential, electrocardiogram, echocardiogram, ultrasound (abdomen/pelvic), skeletal survey, magnetic resonance imaging (brain), bone densitometry (femur)                                                                                                                                                                  |



|     |                                                                                                                                                                             |                                                                                                                                                                                                                                                                                |
|-----|-----------------------------------------------------------------------------------------------------------------------------------------------------------------------------|--------------------------------------------------------------------------------------------------------------------------------------------------------------------------------------------------------------------------------------------------------------------------------|
| 78  | Allergy and immunology, endocrinology, hematology, hepatology, ophthalmology                                                                                                | Computed tomography scan (cerebrum/pituitary), x-ray (hands/joints)                                                                                                                                                                                                            |
| 79  | Dermatology, genetics, immunology, orthopedics                                                                                                                              | Skin biopsy                                                                                                                                                                                                                                                                    |
| 80  | Immunology, neurology, ophthalmology, rheumatology                                                                                                                          | Environmental exposure tests, immunology labs, lumbar puncture, magnetic resonance spectroscopy, metabolomics, rheumatology labs                                                                                                                                               |
| 81  | Audiology, cardiology, dentistry, genetics, neurology, neuropsychology, ophthalmology, otolaryngology, pulmonology, speech-language pathology                               | Echocardiogram, electrocardiogram, fibroblast culture, metabolic labs, research labs, skeletal survey                                                                                                                                                                          |
| 82  | Genetics, ophthalmology                                                                                                                                                     | None                                                                                                                                                                                                                                                                           |
| 83  | Allergy and immunology, audiology, dermatology, hematology, neuropsychology, occupational therapy, ophthalmology, physiatry, physical therapy, rheumatology                 | Electromyography/nerve conduction velocity, electrocardiogram, echocardiogram, ultrasound (abdomen), magnetic resonance imaging (brain), skeletal survey, bone age                                                                                                             |
| 84  | Hematology, ophthalmology, rheumatology                                                                                                                                     | Magnetic resonance imaging (abdomen), positron emission tomography scan (torso), ultrasound (abdomen/liver)                                                                                                                                                                    |
| 85  | Genetics, neurology, neuropsychology, occupational and environmental medicine                                                                                               | Creatine kinase, electroencephalography, liver function tests, lumbar puncture, metabolic labs, muscle biopsy, magnetic resonance imaging/magnetic resonance angiogram (brain)                                                                                                 |
| 86  | Audiology, dermatology, endocrinology, gastroenterology, neuropsychology, ophthalmology                                                                                     | Bone densitometry, echocardiogram, electrocardiogram, electroencephalography, electromyography/nerve conduction velocity, magnetic resonance imaging (brain), skeletal survey, ultrasound (abdomen/adrenal gland/pelvis)                                                       |
| 87  | Genetics                                                                                                                                                                    | Skin biopsy                                                                                                                                                                                                                                                                    |
| 88  | Audiology, cardiology, hepatology, neurology, neuropsychology, occupational therapy, ophthalmology, physiatry, physical therapy, speech-language pathology                  | Electromyography/nerve conduction velocity, electroencephalography, pulmonary function tests, electrocardiogram, echocardiogram, ultrasound (abdomen), magnetic resonance imaging (brain/cervical spine/lumbar spine/thoracic spine), swallow study, skeletal survey, bone age |
| 89  | Audiology, cardiology, dermatology, neurology, neuropsychology, occupational therapy, ophthalmology, otolaryngology, physiatry, physical therapy, speech-language pathology | Electromyography/nerve conduction velocity, electroencephalography, electrocardiogram, echocardiogram, ultrasound (abdomen), bone densitometry (femur/whole body), magnetic resonance angiogram (brain/carotids/chest/abdomen), skeletal survey, x-ray (scoliosis)             |
| 90  | Genetics, neurology                                                                                                                                                         | Electroencephalography, metabolic labs, targeted genetic testing                                                                                                                                                                                                               |
| 91  | Audiology, cardiology, dermatology, genetics, ophthalmology                                                                                                                 | Antibody testing, endocrine studies, environmental exposure tests, immunology labs, renal function tests, liver function tests, metabolic labs, plasma renin activity, targeted genetic testing, thyroid labs, urinalysis                                                      |
| 92  | Audiology, ophthalmology, otolaryngology                                                                                                                                    | Lumbar puncture, magnetic resonance imaging (brain/cervical spine/thoracic spine/lumbar spine/posterior fossa/internal auditory canal)                                                                                                                                         |
| 93  | Audiology, ophthalmology                                                                                                                                                    | Electromyography/nerve conduction velocity, magnetic resonance imaging (brain)                                                                                                                                                                                                 |
| 94  | Dentistry, dermatology, genetics                                                                                                                                            | Echocardiogram, endocrine studies, scalp biopsy, sweat chloride test, targeted genetic testing, ultrasound (abdomen), x-ray (teeth/spine)                                                                                                                                      |
| 95  | Occupational therapy, physiatry, physical therapy                                                                                                                           | Echocardiogram, electrocardiogram, electromyography/nerve conduction velocity, pulmonary function tests                                                                                                                                                                        |
| 96  | Endocrinology, immunology, neurology, rheumatology                                                                                                                          | Endocrine studies, immunology labs, metabolomics, mitochondrial studies, ultrasound (renal/thyroid), rheumatology labs                                                                                                                                                         |
| 97  | Genetics                                                                                                                                                                    | Metabolic labs                                                                                                                                                                                                                                                                 |
| 98  | Audiology, genetics, immunology, neurology, neuropsychology, occupational therapy, ophthalmology, pulmonology, rheumatology                                                 | Magnetic resonance imaging (brain), research labs                                                                                                                                                                                                                              |
| 99  | Genetics, immunology                                                                                                                                                        | Immunology labs                                                                                                                                                                                                                                                                |
| 100 | Audiology, dermatology, ophthalmology                                                                                                                                       | Magnetic resonance imaging (cervical spine/tibia/fibula/thighs/muscle)                                                                                                                                                                                                         |
| 101 | Craniofacial, dermatology, genetics, hematology, hepatology, immunology, neurology, ophthalmology, rheumatology, speech-language pathology                                  | Complete blood count, creatine kinase, hepatology labs, immunology labs, rheumatology labs, skeletal survey, stool studies, ultrasound (abdomen), x-ray (skull)                                                                                                                |
| 102 | Endocrinology, genetics, neurology, neuropsychology, ophthalmology                                                                                                          | Metabolic labs                                                                                                                                                                                                                                                                 |

|     |                                                                                                                                                                           |                                                                                                                                                                                                                                                    |
|-----|---------------------------------------------------------------------------------------------------------------------------------------------------------------------------|----------------------------------------------------------------------------------------------------------------------------------------------------------------------------------------------------------------------------------------------------|
| 103 | Allergy and immunology, gastroenterology, ophthalmology, rheumatology                                                                                                     | Computed tomography angiography (abdomen/aorta)                                                                                                                                                                                                    |
| 104 | Genetics, neurology                                                                                                                                                       | None                                                                                                                                                                                                                                               |
| 105 | None                                                                                                                                                                      | None                                                                                                                                                                                                                                               |
| 106 | Gastroenterology, genetics, immunology, neurodevelopment, neurology                                                                                                       | Research labs                                                                                                                                                                                                                                      |
| 107 | Occupational therapy, ophthalmology, physiatry, physical therapy                                                                                                          | Electromyography/nerve conduction velocity, pulmonary function tests, lumbar puncture, swallow study, magnetic resonance imaging (brain/cervical spine)                                                                                            |
| 108 | Neurogenetics, ophthalmology                                                                                                                                              | Congenital disorders of glycosylation testing, electromyography/nerve conduction velocity, magnetic resonance imaging/magnetic resonance spectroscopy                                                                                              |
| 109 | Ophthalmology                                                                                                                                                             | Lumbar puncture, magnetic resonance imaging (cervical/thoracic/lumbar/brain/pituitary), ultrasound (abdomen)                                                                                                                                       |
| 110 | Genetics, neurology, ophthalmology, orthopedics, pulmonology                                                                                                              | Magnetic resonance imaging (brain), research labs, skeletal survey                                                                                                                                                                                 |
| 111 | Endocrinology, neuropsychology, ophthalmology                                                                                                                             | Electromyography/nerve conduction velocity, bone scan, magnetic resonance imaging (brain/pituitary/cervical spine), computed tomography scan (abdomen/pelvis/cerebrum), swallow study, lumbar puncture                                             |
| 112 | Cardiology, endocrinology, genetics, neurodevelopment, neurology, orthopedics, otolaryngology                                                                             | Echocardiogram, electrocardiogram, research labs, skeletal survey                                                                                                                                                                                  |
| 113 | Genetics, neurology, ophthalmology                                                                                                                                        | Magnetic resonance imaging                                                                                                                                                                                                                         |
| 114 | Audiology, infectious disease, neuropsychology, nutrition, ophthalmology, rheumatology, speech-language pathology                                                         | Electromyography/nerve conduction velocity, electroencephalography, skeletal survey, x-ray (scoliosis/pelvis), magnetic resonance imaging (brain), swallow study, ultrasound (abdomen)                                                             |
| 115 | Genetics, neurology                                                                                                                                                       | Metabolomics, skin biopsy                                                                                                                                                                                                                          |
| 116 | Audiology, cardiology, endocrinology, neurology, neuropsychology, occupational therapy, ophthalmology, physiatry, physical therapy                                        | Electromyography/nerve conduction velocity, electrocardiogram, echocardiogram                                                                                                                                                                      |
| 117 | Dermatology, genetics, immunology, infectious disease, nephrology, neurodevelopment, rheumatology                                                                         | Immunology labs, infectious disease studies, renal function tests, research labs                                                                                                                                                                   |
| 118 | Acupuncture, audiology, neuropsychology                                                                                                                                   | Electrocardiogram, magnetic resonance imaging (brain), computed tomography scan (cerebrum/chest/pelvis/femur/foot/humerus/neck/radius/ulna/tibia/fibula), x-ray (spine), lumbar puncture                                                           |
| 119 | Cardiology, genetics, nephrology, ophthalmology, orthopedics                                                                                                              | Echocardiogram, electrocardiogram, renal function tests, research labs, skeletal survey, ultrasound (renal)                                                                                                                                        |
| 120 | Genetics, neurology                                                                                                                                                       | None                                                                                                                                                                                                                                               |
| 121 | Audiology, cardiology, dermatology, endocrinology, neuropsychology, nutrition, physiatry, physical therapy, occupational therapy, rheumatology, speech-language pathology | Electromyography/nerve conduction velocity, electroencephalography, echocardiogram, electrocardiogram, ultrasound (abdomen), magnetic resonance imaging/magnetic resonance spectroscopy (brain), skeletal survey, x-ray (scoliosis), swallow study |
| 122 | Acupuncture, neuropsychology, pain and palliative care                                                                                                                    | Bone densitometry (femur/radius/spine), computed tomography scan (abdomen/cerebrum/chest/femur/fibula/humerus/cervical spine/pelvis/tibia), echocardiogram, electrocardiogram, ultrasound (carotids)                                               |
| 123 | Audiology, endocrinology, neuropsychology, nutrition, occupational therapy, ophthalmology, physiatry, physical therapy                                                    | Electromyography/nerve conduction velocity, electroencephalography, echocardiogram, ultrasound (abdomen), magnetic resonance imaging/magnetic resonance spectroscopy (brain), skeletal survey, x-ray (scoliosis)                                   |
| 124 | Immunology, neurogenetics, ophthalmology                                                                                                                                  | Immunology labs, magnetic resonance imaging, metabolic labs                                                                                                                                                                                        |
| 125 | Audiology, endocrinology, neurology, ophthalmology, pulmonology                                                                                                           | Fibroblast respiration studies (Seahorse), metabolomics, RNA sequencing, skin biopsy                                                                                                                                                               |
| 126 | Genetics, neurology                                                                                                                                                       | Congenital disorders of glycosylation testing, echocardiogram, exon-level microarray, magnetic resonance angiogram, magnetic resonance imaging (brain), magnetic resonance spectroscopy, skeletal survey                                           |
| 127 | Endocrinology, genetics, neurology                                                                                                                                        | Endocrine studies, metabolic labs                                                                                                                                                                                                                  |

|     |                                                                                                                                                                                                                  |                                                                                                                                                                                                                                                                                                |
|-----|------------------------------------------------------------------------------------------------------------------------------------------------------------------------------------------------------------------|------------------------------------------------------------------------------------------------------------------------------------------------------------------------------------------------------------------------------------------------------------------------------------------------|
| 128 | Dentistry, dermatology, gastroenterology, genetics, hematology, nephrology, neurodevelopment, ophthalmology                                                                                                      | Research labs, skeletal survey, skin biopsy, targeted genetic testing, ultrasound (renal)                                                                                                                                                                                                      |
| 129 | Endocrinology, genetics                                                                                                                                                                                          | Computed tomography scan (pelvis), endocrine studies, magnetic resonance imaging, targeted genetic testing                                                                                                                                                                                     |
| 130 | Genetics                                                                                                                                                                                                         | None                                                                                                                                                                                                                                                                                           |
| 131 | Genetics, neurology                                                                                                                                                                                              | Pulmonary function tests                                                                                                                                                                                                                                                                       |
| 132 | Genetics, neurology                                                                                                                                                                                              | Skin biopsy                                                                                                                                                                                                                                                                                    |
| 133 | Genetics, immunology, neurology                                                                                                                                                                                  | Environmental exposure tests, muscle biopsy, thyroid function tests, x-ray (hand/spine)                                                                                                                                                                                                        |
| 134 | Endocrinology, genetics, neurology                                                                                                                                                                               | Audiology testing, radiology testing                                                                                                                                                                                                                                                           |
| 135 | Audiology, endocrinology, genetics, neurodevelopment, neurology, ophthalmology                                                                                                                                   | Magnetic resonance imaging (brain), research labs                                                                                                                                                                                                                                              |
| 136 | Occupational therapy, ophthalmology, physiatry, physical therapy                                                                                                                                                 | Lumbar puncture, swallow study, magnetic resonance imaging (brain/cervical spine/lumbar spine/thoracic spine), ultrasound (abdomen), electromyography/nerve conduction velocity                                                                                                                |
| 137 | Genetics, neurology, neurodevelopment                                                                                                                                                                            | Research labs, targeted genetic testing                                                                                                                                                                                                                                                        |
| 138 | Genetics, neurology, neurodevelopment, neuropsychology                                                                                                                                                           | Echocardiogram, electrocardiogram, research labs                                                                                                                                                                                                                                               |
| 139 | Audiology, neurodevelopment, neurology, nutrition, occupational therapy, ophthalmology, physiatry, physical therapy                                                                                              | Skeletal survey, swallow study, bone age, bone densitometry, x-ray (chest), magnetic resonance imaging/magnetic resonance spectroscopy (brain), ultrasound (abdomen), electroencephalography, electromyography/nerve conduction velocity                                                       |
| 140 | Allergy and immunology, audiology, endocrinology, neurodevelopment, nutrition, occupational therapy, physiatry, physical therapy                                                                                 | Skeletal survey, swallow study, bone densitometry, magnetic resonance imaging/magnetic resonance spectroscopy (brain), ultrasound (abdomen), echocardiogram, electrocardiogram, electroencephalography, electromyography/nerve conduction velocity, autonomic nervous system testing           |
| 141 | Allergy and immunology, hematology                                                                                                                                                                               | Computed tomography scan (abdomen/chest/sinuses)                                                                                                                                                                                                                                               |
| 142 | Nutrition, occupational therapy, ophthalmology, physiatry, physical therapy, speech-language pathology                                                                                                           | Swallow study, computed tomography scan (cerebrum), echocardiogram, electrocardiogram, electroencephalography, electromyography/nerve conduction velocity, lumbar puncture, magnetic resonance imaging (brain/lumbar spine/cervical spine/thoracic spine), ultrasound (abdomen), x-ray (chest) |
| 143 | Audiology, neurodevelopment, neurology, nutrition, occupational therapy, ophthalmology, physiatry, physical therapy, speech-language pathology                                                                   | Skeletal survey, swallow study, magnetic resonance imaging/magnetic resonance spectroscopy (brain), bone densitometry, ultrasound (abdomen), electrocardiogram, echocardiogram, electroencephalography, electromyography/nerve conduction velocity                                             |
| 144 | N/A                                                                                                                                                                                                              | None                                                                                                                                                                                                                                                                                           |
| 145 | Audiology, neurodevelopment, nutrition, occupational therapy, physiatry, physical therapy, speech-language pathology                                                                                             | Skeletal survey, swallow study, bone age, magnetic resonance imaging/magnetic resonance spectroscopy (brain), ultrasound (abdomen), electrocardiogram, echocardiogram, electroencephalography, sleep study, autonomic nervous system testing, electromyography/nerve conduction velocity       |
| 146 | Audiology, endocrinology, gastroenterology, neurodevelopment, nutrition, ophthalmology, recreational therapy                                                                                                     | Skeletal survey, bone age, magnetic resonance imaging (brain/pituitary), magnetic resonance spectroscopy (brain), ultrasound (abdomen), electrocardiogram, echocardiogram, electroencephalography, autonomic nervous system testing, electromyography/nerve conduction velocity                |
| 147 | Genetics                                                                                                                                                                                                         | Metabolomics, RNA sequencing, skin biopsy, targeted genetic testing                                                                                                                                                                                                                            |
| 148 | Audiology, dentistry, gastroenterology, neurodevelopment, nutrition, occupational therapy, ophthalmology, pain and palliative care, physiatry, physical therapy, recreational therapy, speech-language pathology | Skeletal survey, bone age, swallow study, ultrasound (abdomen), magnetic resonance imaging/magnetic resonance spectroscopy (brain), electroencephalography, electromyography/nerve conduction velocity, sleep study                                                                            |
| 149 | Occupational therapy, ophthalmology, physiatry, physical therapy                                                                                                                                                 | Lumbar puncture, magnetic resonance imaging (brain/spine), ultrasound (abdomen), electromyography/nerve conduction velocity                                                                                                                                                                    |

|     |                                                                                                                                                                                                                    |                                                                                                                                                                                                                                                                                          |
|-----|--------------------------------------------------------------------------------------------------------------------------------------------------------------------------------------------------------------------|------------------------------------------------------------------------------------------------------------------------------------------------------------------------------------------------------------------------------------------------------------------------------------------|
| 150 | Dermatology, occupational therapy, ophthalmology, psychiatry, physical therapy, recreational therapy                                                                                                               | Computed tomography scan (chest), echocardiogram, electromyography/nerve conduction velocity, lumbar puncture, magnetic resonance imaging (brain/muscle/cervical spine/lumbar spine/thoracic spine), pulmonary function tests                                                            |
| 151 | Neuropsychology, occupational therapy, ophthalmology, psychiatry, physical therapy, speech-language pathology                                                                                                      | Swallow study, lumbar puncture, magnetic resonance imaging (brain), electroencephalography, electroencephalography-evoked potential, electromyography/nerve conduction velocity                                                                                                          |
| 152 | Ophthalmology, psychiatry, physical therapy                                                                                                                                                                        | Echocardiogram, electromyography/nerve conduction velocity, magnetic resonance imaging (brain/cervical spine/lumbar spine/thoracic spine)                                                                                                                                                |
| 153 | Genetics, neurology                                                                                                                                                                                                | Chromosomal microarray, magnetic resonance imaging, metabolomics, nerve conduction velocity                                                                                                                                                                                              |
| 154 | Endocrinology, genetics, nutrition, occupational therapy, ophthalmology, psychiatry, physical therapy, pulmonology, speech-language pathology                                                                      | Swallow study, computed tomography scan (chest), magnetic resonance imaging (brain), perfusion lung scan, bone densitometry, ultrasound (veins/abdomen), electrocardiogram, echocardiogram, pulmonary function tests, electromyography/nerve conduction velocity, electroencephalography |
| 155 | Endocrinology, genetics, hematology, immunology, neurology                                                                                                                                                         | Bone marrow biopsy, metabolic labs, endocrine studies, immunology labs, metabolomics, pancreatic function tests, skeletal survey, ultrasound (abdomen)                                                                                                                                   |
| 156 | Dentistry, neuropsychology, ophthalmology                                                                                                                                                                          | Lumbar puncture, magnetic resonance imaging (brain/cervical spine/lumbar spine/thoracic spine), ultrasound (liver), electromyography/nerve conduction velocity                                                                                                                           |
| 157 | Dermatology, hematology, nephrology, occupational therapy, ophthalmology, pain and palliative care, psychiatry, physical therapy, rheumatology                                                                     | Echocardiogram, positron emission tomography scan (torso), ultrasound (abdomen/renal), x-ray (hands/knees/shoulders/spine)                                                                                                                                                               |
| 158 | Ophthalmology                                                                                                                                                                                                      | Metabolomics                                                                                                                                                                                                                                                                             |
| 159 | Audiology, dentistry, genetics, ophthalmology, psychiatry, physical therapy                                                                                                                                        | Skeletal survey, magnetic resonance imaging (brain), ultrasound (abdomen), electrocardiogram, echocardiogram                                                                                                                                                                             |
| 160 | Dermatology, endocrinology, hematology, nephrology, occupational therapy, ophthalmology, psychiatry, physical therapy                                                                                              | Echocardiogram, electrocardiogram, positron emission tomography scan (torso), ultrasound (liver/renal), x-ray (chest)                                                                                                                                                                    |
| 161 | Cardiology, genetics, neurology                                                                                                                                                                                    | Echocardiogram, electrocardiogram                                                                                                                                                                                                                                                        |
| 162 | Genetics                                                                                                                                                                                                           | None                                                                                                                                                                                                                                                                                     |
| 163 | Gastroenterology, genetics, neurology, nephrology, ophthalmology, orthopedics                                                                                                                                      | Research labs, skeletal survey, ultrasound (renal)                                                                                                                                                                                                                                       |
| 164 | Cardiology, genetics, immunology, nephrology, neurology, neuropsychology, otolaryngology                                                                                                                           | Computed tomography scan (abdomen/renal), echocardiogram, electrocardiogram, electromyography, immunology labs, renal function tests, research labs                                                                                                                                      |
| 165 | Dentistry, endocrinology, neurology, occupational therapy, ophthalmology, psychiatry, physical therapy, speech-language pathology                                                                                  | Bone age, electromyography/nerve conduction velocity, magnetic resonance imaging/magnetic resonance spectroscopy (brain), skeletal survey, swallow study                                                                                                                                 |
| 166 | Genetics                                                                                                                                                                                                           | Exon-level microarray, renal function tests, metabolic labs, metabolomics                                                                                                                                                                                                                |
| 167 | Allergy and immunology, audiology, gastroenterology, infectious disease, neurology, nutrition, occupational therapy, otolaryngology, psychiatry, physical therapy, recreational therapy, speech-language pathology | Swallow study, electroencephalography, x-ray (abdomen/spine/cervical/thoracic), bone age, skeletal survey, magnetic resonance imaging (brain/abdomen/orbits/pituitary), magnetic resonance angiogram (carotids), ultrasound (abdomen)                                                    |
| 168 | Genetics, neurology                                                                                                                                                                                                | Skin biopsy, metabolomics                                                                                                                                                                                                                                                                |
| 169 | Gastroenterology, genetics, neurology, neuropsychology, ophthalmology, otolaryngology, speech-language pathology                                                                                                   | Research labs                                                                                                                                                                                                                                                                            |
| 170 | Dentistry, infectious disease, ophthalmology                                                                                                                                                                       | Computed tomography scan (mandible/neck/chest/abdomen/pelvis), echocardiogram, magnetic resonance imaging (brain/orbits/pituitary), positron emission tomography scan (torso), x-ray (long bones/chest)                                                                                  |
| 171 | Audiology, dentistry, neurodevelopment, nutrition, occupational therapy, ophthalmology, psychiatry, physical therapy, speech-language pathology                                                                    | Swallow study, bone age, skeletal survey, computed tomography scan (cerebrum), ultrasound (abdomen), echocardiogram, electrocardiogram, electroencephalography, autonomic nervous system testing, electromyography/nerve conduction velocity, sleep study                                |

|     |                                                                                                                                                                                            |                                                                                                                                                                                                                                                                                  |
|-----|--------------------------------------------------------------------------------------------------------------------------------------------------------------------------------------------|----------------------------------------------------------------------------------------------------------------------------------------------------------------------------------------------------------------------------------------------------------------------------------|
| 172 | Audiology, endocrinology, genetics, nephrology, neurodevelopment, neurology, ophthalmology, orthopedics                                                                                    | Endocrine studies, renal function tests, research labs, skeletal survey                                                                                                                                                                                                          |
| 173 | Nephrology, ophthalmology, occupational therapy, physiatry, physical therapy, speech-language pathology                                                                                    | Swallow study, electroencephalography, electroencephalography-evoked potential, electromyography/nerve conduction velocity, lumbar puncture, magnetic resonance imaging/magnetic resonance spectroscopy (brain/lumbar spine/cervical spine/thoracic spine), x-ray (chest)        |
| 174 | Genetics                                                                                                                                                                                   | Nasal brush biopsy                                                                                                                                                                                                                                                               |
| 175 | Occupational therapy, ophthalmology, physiatry, physical therapy                                                                                                                           | Lumbar puncture, magnetic resonance imaging/magnetic resonance spectroscopy (brain), magnetic resonance imaging (cervical spine/thoracic spine/lumbar spine), echocardiogram, autonomic nervous system testing, electromyography/nerve conduction velocity                       |
| 176 | Endocrinology, genetics, neurology, nutrition                                                                                                                                              | Bone age, bone densitometry, calorimetry, endocrinology labs, metabolomics                                                                                                                                                                                                       |
| 177 | Neurology, ophthalmology                                                                                                                                                                   | Metabolomics                                                                                                                                                                                                                                                                     |
| 178 | Audiology, cardiology, neurology, neurodevelopment, ophthalmology                                                                                                                          | Echocardiogram, electrocardiogram, electroencephalography                                                                                                                                                                                                                        |
| 179 | Cardiology, genetics, neurogenetics, neurology, ophthalmology                                                                                                                              | Mitochondrial studies                                                                                                                                                                                                                                                            |
| 180 | Genetics, neurology                                                                                                                                                                        | Skin biopsy                                                                                                                                                                                                                                                                      |
| 181 | Audiology, dentistry, endocrinology, gastroenterology, genetics, nephrology, neurology, neuropsychology, orthopedics                                                                       | Endocrine studies, renal function tests, magnetic resonance imaging (brain), research labs, skeletal survey                                                                                                                                                                      |
| 182 | Endocrinology, gastroenterology, genetics, immunology, infectious Disease, neurology, neuropsychology, ophthalmology, psychiatry, rheumatology, speech-language pathology                  | Electroencephalography, endocrine studies, hepatology labs, immunology labs, infectious disease studies, magnetic resonance imaging (brain/spine), research labs, ultrasound (bladder/liver)                                                                                     |
| 183 | Genetics                                                                                                                                                                                   | Metabolic labs                                                                                                                                                                                                                                                                   |
| 184 | Cardiology, hematology, ophthalmology, rheumatology                                                                                                                                        | Positron emission tomography scan (torso), x-ray (pelvis)                                                                                                                                                                                                                        |
| 185 | Endocrinology, immunology, neurogenetics, occupational and environmental medicine, rheumatology                                                                                            | Environmental exposure tests, lumbar puncture, immunology labs, metabolomics, mitochondrial studies, muscle biopsy                                                                                                                                                               |
| 186 |                                                                                                                                                                                            | Lumbar puncture, metabolomics, skin biopsy                                                                                                                                                                                                                                       |
| 187 | Genetics, neurology                                                                                                                                                                        | Metabolomics, skin biopsy                                                                                                                                                                                                                                                        |
| 188 | Cardiology                                                                                                                                                                                 | Metabolomics, skin biopsy                                                                                                                                                                                                                                                        |
| 189 | Genetics, neurology                                                                                                                                                                        | None                                                                                                                                                                                                                                                                             |
| 190 | Genetics                                                                                                                                                                                   | Induced pluripotent stem cell/cardiomyocyte studies, metabolomics, skin biopsy                                                                                                                                                                                                   |
| 191 | Occupational therapy, ophthalmology, physiatry, physical therapy                                                                                                                           | Computed tomography scan (abdomen/cerebrum/chest/femur/fibula/foot/humerus/cervical spine/pelvis/radius/ulna/tibia), electrocardiogram, electroencephalography-evoked potential, electromyography/nerve conduction velocity, lumbar puncture, magnetic resonance imaging (brain) |
| 192 | Genetics, neuromuscular, neuropsychology                                                                                                                                                   | Electroencephalography, endocrine studies, lipid panel, skeletal survey, thyroid labs, uric acid                                                                                                                                                                                 |
| 193 | Genetics, neurology, ophthalmology                                                                                                                                                         | Antibody testing, metabolic labs                                                                                                                                                                                                                                                 |
| 194 | Occupational therapy, ophthalmology, physiatry, physical therapy                                                                                                                           | Lumbar puncture, computed tomography scan (cerebrum), magnetic resonance imaging (brain), electromyography/nerve conduction velocity                                                                                                                                             |
| 195 | Genetics, neuromuscular, neuropsychology                                                                                                                                                   | None                                                                                                                                                                                                                                                                             |
| 196 | Allergy and immunology, audiology, genetics, neurology, neuropsychology, nutrition, occupational therapy, ophthalmology, otolaryngology, physiatry, physical therapy, recreational therapy | Magnetic resonance imaging/magnetic resonance spectroscopy (brain), bone densitometry, ultrasound (abdomen), electrocardiogram, echocardiogram, electromyography/nerve conduction velocity, sleep study, autonomic nervous system testing                                        |
| 197 | Genetics, neurology, neuromuscular, ophthalmology                                                                                                                                          | Electroencephalography-evoked potential, magnetic resonance imaging (brain)                                                                                                                                                                                                      |
| 198 | Dentistry, genetics, pulmonology, ophthalmology                                                                                                                                            | None                                                                                                                                                                                                                                                                             |

|     |                                                                                                                                                                                         |                                                                                                                                                                                                                                                                                             |
|-----|-----------------------------------------------------------------------------------------------------------------------------------------------------------------------------------------|---------------------------------------------------------------------------------------------------------------------------------------------------------------------------------------------------------------------------------------------------------------------------------------------|
| 199 | Dermatology, neuropsychology, occupational therapy, ophthalmology, psychiatry, physical therapy, recreational therapy, rheumatology, speech-language pathology                          | Lumbar puncture, computed tomography scan (chest/lung), magnetic resonance imaging (brain/cervical spine/lumbar spine/thoracic spine), ultrasound (abdomen), electromyography/nerve conduction velocity                                                                                     |
| 200 | Audiology, dentistry, dermatology, neurodevelopment, neurology, nutrition, occupational therapy, ophthalmology, otolaryngology, psychiatry, physical therapy, speech-language pathology | Bone age, skeletal survey, x-ray (chest), magnetic resonance imaging/magnetic resonance spectroscopy (brain), ultrasound (abdomen), echocardiogram, electrocardiogram, electromyography/nerve conduction velocity, electroencephalography-evoked potential                                  |
| 201 | Cardiology, dentistry, genetics, occupational therapy, neurology, ophthalmology, orthopedics, psychiatry, physical therapy, recreational therapy, rheumatology                          | Bone age, skeletal survey, computed tomography scan (heart), ultrasound (abdomen), electrocardiogram, echocardiogram, electromyography/nerve conduction velocity                                                                                                                            |
| 202 | Genetics, neurology                                                                                                                                                                     | Electromyography/nerve conduction velocity                                                                                                                                                                                                                                                  |
| 203 | Cardiology, genetics, immunology, neurology, ophthalmology                                                                                                                              | Antibody testing, complete blood count, echocardiogram, electrocardiogram, electroretinography, hair biopsy, immunology labs                                                                                                                                                                |
| 204 | Audiology, dentistry, gastroenterology, genetics, neurodevelopment, neurology, neuropsychology, ophthalmology                                                                           | Magnetic resonance imaging (brain), research labs                                                                                                                                                                                                                                           |
| 205 | Cancer genetics, genetics, neuroimmunology, occupational and environmental medicine                                                                                                     | Antibody testing, electromyography/nerve conduction velocity, environmental exposure tests, infectious disease studies, skin biopsy, targeted genetic testing                                                                                                                               |
| 206 | Endocrinology, genetics, neurodevelopment, neurology, neuropsychology, ophthalmology, orthopedics, speech-language pathology                                                            | Endocrine studies, neurology labs, research labs, skeletal survey                                                                                                                                                                                                                           |
| 207 | Genetics, immunology, nephrology, pulmonology, rheumatology                                                                                                                             | Echocardiogram, computed tomography scan (chest), immunology labs, renal function tests, pulmonary function tests, rheumatology labs, skin biopsy, stress test, ultrasound (renal), x-ray (chest)                                                                                           |
| 208 | Bioethics, cardiology, dentistry, genetics, endocrinology, ophthalmology, rheumatology                                                                                                  | Bone age, skeletal survey, computed tomography scan (crebrum), magnetic resonance imaging (brain/cervical spine/lumbar spine/thoracic spine), ultrasound (abdomen), echocardiogram, electrocardiogram, electromyography/nerve conduction velocity                                           |
| 209 | Hepatology, psychiatry, physical therapy, rheumatology                                                                                                                                  | Computed tomography scan (chest), pulmonary function tests, x-ray (chest)                                                                                                                                                                                                                   |
| 210 | Neuropsychology, ophthalmology                                                                                                                                                          | Lumbar puncture, computed tomography scan (cerebrum/chest/abdomen/pelvis/femur/foot/humerus/neck/radius/ulna/tibia/fibula) magnetic resonance imaging (brain/spine), bone densitometry, ultrasound (abdomen), electrocardiogram, echocardiogram, electromyography/nerve conduction velocity |
| 211 | Cardiology, internal medicine, neurogenetics, neuropsychology, ophthalmology                                                                                                            | Complete blood count, chromosomal microarray, electrocardiogram, electromyography/nerve conduction velocity, lumbar puncture, magnetic resonance imaging/magnetic resonance spectroscopy (brain), metabolomics                                                                              |
| 212 | Audiology, occupational therapy, ophthalmology, psychiatry, physical therapy, recreational therapy, speech-language pathology                                                           | Lumbar puncture, magnetic resonance imaging (brain/cervical spine/lumbar spine/thoracic spine), ultrasound (abdomen), electroencephalography-evoked potential, electromyography/nerve conduction velocity, autonomic nervous system testing                                                 |
| 213 | Audiology, genetics, neurology, neuropsychology, ophthalmology, speech-language pathology                                                                                               | Magnetic resonance imaging (brain), research labs                                                                                                                                                                                                                                           |
| 214 | Genetics, neurology, neuropsychology, ophthalmology                                                                                                                                     | Complete blood count, creatine kinase, echocardiogram, magnetic resonance imaging (brain), metabolic labs                                                                                                                                                                                   |
| 215 | Genetics                                                                                                                                                                                | None                                                                                                                                                                                                                                                                                        |
| 216 | Cardiology, endocrinology, genetics, hematology, nephrology, neurology, ophthalmology                                                                                                   | Echocardiogram, electrocardiogram, pulmonary function tests, electroencephalography, electromyography/nerve conduction velocity, magnetic resonance imaging (brain/spine/orbits), magnetic resonance spectroscopy (brain), ultrasound (renal)                                               |
| 217 | Cardiology, hematology, pain and palliative care, occupational therapy, psychiatry, physical therapy, pulmonology                                                                       | Autonomic nervous system testing, computed tomography scan (chest), magnetic resonance imaging (brain), echocardiogram, electrocardiogram, pulmonary function tests, x-ray (chest)                                                                                                          |

|     |                                                                                                                                                                                                               |                                                                                                                                                                                                                                                                                                |
|-----|---------------------------------------------------------------------------------------------------------------------------------------------------------------------------------------------------------------|------------------------------------------------------------------------------------------------------------------------------------------------------------------------------------------------------------------------------------------------------------------------------------------------|
| 218 | Dentistry, genetics, neuropsychology, ophthalmology, psychiatry, recreational therapy, speech-language pathology                                                                                              | Bone age, magnetic resonance imaging/magnetic resonance spectroscopy (brain), skeletal survey, swallow study                                                                                                                                                                                   |
| 219 | Audiology, dentistry, endocrinology, neurodevelopment, neurology, nutrition, occupational therapy, ophthalmology, otolaryngology, physiatry, physical therapy, recreational therapy                           | Bone age, bone densitometry, echocardiogram, electromyography/nerve conduction velocity, skeletal survey, swallow study, x-ray (chest)                                                                                                                                                         |
| 220 | Genetics, neuropsychology                                                                                                                                                                                     | Metabolic labs, skeletal survey                                                                                                                                                                                                                                                                |
| 221 | Audiology, cardiology, genetics, neurology, orthopedics, otolaryngology, physical therapy, pulmonology, speech-language pathology                                                                             | Echocardiogram, electrocardiogram, electromyography, fibroblast culture, muscle biopsy, research labs, skeletal survey                                                                                                                                                                         |
| 222 | Allergy and immunology, gastroenterology, infectious disease, neurology, neurosurgery, pulmonology, rheumatology                                                                                              | Cytokine profiling, gastric emptying study, immunology labs, metabolomics, muscle biopsy, positron emission tomography/computed tomography scan, RNA sequencing, skin biopsy                                                                                                                   |
| 223 | Audiology, dentistry, endocrinology, neurodevelopment, physiatry                                                                                                                                              | Magnetic resonance imaging/magnetic resonance spectroscopy (brain), skeletal survey, bone densitometry, ultrasound (abdomen)                                                                                                                                                                   |
| 224 | Cardiology, neurology, ophthalmology                                                                                                                                                                          | Echocardiogram                                                                                                                                                                                                                                                                                 |
| 225 | Internal medicine                                                                                                                                                                                             | Metabolomics                                                                                                                                                                                                                                                                                   |
| 226 | Endocrinology, genetics, neuromuscular                                                                                                                                                                        | Antibody testing, bone age, complete blood count, creatine kinase, electrolytes, endocrine studies, targeted genetic testing, thyroid function tests, vitamin D                                                                                                                                |
| 227 | Genetics, neurodevelopment, neurology                                                                                                                                                                         | Magnetic resonance imaging (brain), optical coherence tomography, research labs                                                                                                                                                                                                                |
| 228 | Genetics, hematology, ophthalmology                                                                                                                                                                           | Magnetic resonance imaging (brain/femurs/spine/thighs/femurs), skeletal survey, ultrasound (renal)                                                                                                                                                                                             |
| 229 | Endocrinology, ophthalmology                                                                                                                                                                                  | Lumbar puncture, magnetic resonance imaging (brain)                                                                                                                                                                                                                                            |
| 230 | Genetics, neurology                                                                                                                                                                                           | Cytokine profiling, skin biopsy                                                                                                                                                                                                                                                                |
| 231 | Genetics, neurology, ophthalmology                                                                                                                                                                            | Muscle biopsy                                                                                                                                                                                                                                                                                  |
| 232 | Allergy and immunology, dentistry, endocrinology, gastroenterology, hematology, neurology, physiatry                                                                                                          | Bone age, magnetic resonance imaging (brain/pituitary), ultrasound (abdomen)                                                                                                                                                                                                                   |
| 233 | Genetics, neurology, ophthalmology, surgery                                                                                                                                                                   | Complete blood count, chromosomal microarray, environmental exposure tests, magnetic resonance imaging/magnetic resonance spectroscopy, metabolic labs, mitochondrial studies, muscle biopsy                                                                                                   |
| 234 | Neurology, ophthalmology, pain and palliative care, rheumatology                                                                                                                                              | Swallow study, magnetic resonance imaging (brain/spine), skeletal survey, ultrasound (abdomen)                                                                                                                                                                                                 |
| 235 | Cardiology, endocrinology, genetics, neurodevelopment, neurology                                                                                                                                              | Echocardiogram, electrocardiogram, research labs, skeletal survey                                                                                                                                                                                                                              |
| 236 | Cardiology, genetics                                                                                                                                                                                          | Skin biopsy                                                                                                                                                                                                                                                                                    |
| 237 | Cardiology, genetics, neurology, neuropsychology, ophthalmology, orthopedics, physical therapy, pulmonology                                                                                                   | Echocardiogram, electrocardiogram, electromyography, magnetic resonance imaging (heart), research labs                                                                                                                                                                                         |
| 238 | Genetics, ophthalmology                                                                                                                                                                                       | Electrocardiogram, metabolomics                                                                                                                                                                                                                                                                |
| 239 | Genetics, immunology, neurology                                                                                                                                                                               | immunology labs                                                                                                                                                                                                                                                                                |
| 240 | Dermatology, endocrinology, genetics, immunology, neurogenetics, neurology, ophthalmology, rheumatology                                                                                                       | Chromosomal microarray, immunology labs, magnetic resonance imaging, nerve conduction velocity, skin biopsy, somatosensory evoked potential testing                                                                                                                                            |
| 241 | Dermatology, gastroenterology, hematology, immunology, nephrology, neurology, ophthalmology, pulmonology                                                                                                      | Computed tomography scan (head), immunology labs, magnetic resonance imaging (brain), metabolic labs, positron emission tomography scan, skeletal survey, ultrasound (abdomen)                                                                                                                 |
| 242 | Allergy and immunology, audiology, cardiology, dentistry, endocrinology, hematology, neurodevelopment, neurology, occupational therapy, ophthalmology, physiatry, physical therapy, speech-language pathology | Swallow study, bone densitometry (femur), echocardiogram, electrocardiogram, electromyography/nerve conduction velocity, holter monitor, magnetic resonance imaging/magnetic resonance spectroscopy (brain), metabolic cart, skeletal survey, ultrasound (abdomen), x-ray (pelvis/skull/spine) |

|     |                                                                                                                                                                                                                                                 |                                                                                                                                                                                                                                                                                                                                                                                                                                                                                                                                                                           |
|-----|-------------------------------------------------------------------------------------------------------------------------------------------------------------------------------------------------------------------------------------------------|---------------------------------------------------------------------------------------------------------------------------------------------------------------------------------------------------------------------------------------------------------------------------------------------------------------------------------------------------------------------------------------------------------------------------------------------------------------------------------------------------------------------------------------------------------------------------|
| 243 | Allergy and immunology, audiology, endocrinology, hematology, nephrology, nutrition, occupational therapy, otolaryngology, psychiatry, physical therapy, rheumatology                                                                           | Computed tomography scan (femur/chest/abdomen/pelvis/sinuses/tibia/fibula), echocardiogram, electrocardiogram, endoscopy, positron emission tomography scan (extremities/torso), bone densitometry (radius/femur/spine), octreoscan, skeletal survey, skin biopsy, ultrasound (renal), x-ray (chest)                                                                                                                                                                                                                                                                      |
| 244 | Genetics, neurology, ophthalmology                                                                                                                                                                                                              | Computed tomography scan (head), electromyography/nerve conduction velocity, oral riboflavin challenge, targeted genetic testing                                                                                                                                                                                                                                                                                                                                                                                                                                          |
| 245 | Genetics, neurogenetics, neurology, ophthalmology                                                                                                                                                                                               | Bone age, skeletal survey,                                                                                                                                                                                                                                                                                                                                                                                                                                                                                                                                                |
| 246 | Genetics, immunology, neurology, neuropsychology                                                                                                                                                                                                | Bone densitometry, electromyography, endocrine studies, targeted genetic testing                                                                                                                                                                                                                                                                                                                                                                                                                                                                                          |
| 247 | Endocrinology, genetics, neurology, ophthalmology                                                                                                                                                                                               | Endocrine studies, metabolic labs                                                                                                                                                                                                                                                                                                                                                                                                                                                                                                                                         |
| 248 | Gastroenterology, neurogenetics, neuroimmunology, ophthalmology                                                                                                                                                                                 | Liver function tests, metabolic labs, metabolomics, ultrasound (abdomen)                                                                                                                                                                                                                                                                                                                                                                                                                                                                                                  |
| 249 | Dentistry, genetics, hematology, neuropsychology                                                                                                                                                                                                | Bone marrow biopsy, magnetic resonance imaging (brain), metabolic labs                                                                                                                                                                                                                                                                                                                                                                                                                                                                                                    |
| 250 | Genetics, ophthalmology                                                                                                                                                                                                                         | None                                                                                                                                                                                                                                                                                                                                                                                                                                                                                                                                                                      |
| 251 | Cardiology, dermatology, genetics, immunology                                                                                                                                                                                                   | Cytokine profiling, skin biopsy                                                                                                                                                                                                                                                                                                                                                                                                                                                                                                                                           |
| 252 | Genetics, neuropsychology                                                                                                                                                                                                                       | None                                                                                                                                                                                                                                                                                                                                                                                                                                                                                                                                                                      |
| 253 | Cardiology, genetics, neurology, pulmonology                                                                                                                                                                                                    | Complete blood count, creatine phosphokinase, echocardiogram, electrocardiogram, magnetic resonance imaging (lower extremities), muscle biopsy, pulmonary function tests                                                                                                                                                                                                                                                                                                                                                                                                  |
| 254 | Nephrology                                                                                                                                                                                                                                      | Skeletal survey, ultrasound (abdomen)                                                                                                                                                                                                                                                                                                                                                                                                                                                                                                                                     |
| 255 | Audiology, dentistry, neurodevelopment, neurology, occupational therapy, ophthalmology, otolaryngology, psychiatry, physical therapy, speech-language pathology                                                                                 | Autonomic nervous system testing, swallow study, bone age, electromyography/nerve conduction velocity, electroencephalography, electrocardiogram, ultrasound (abdomen), magnetic resonance spectroscopy/magnetic resonance angiogram (brain), magnetic resonance imaging (brain/cervical spine/lumbar spine/thoracic spine), computed tomography scan (cerebrum), skeletal survey, sleep study, x-ray (forearm/scoliosis)                                                                                                                                                 |
| 256 | Genetics, pathology                                                                                                                                                                                                                             | Cytokine profiling, lumbar puncture, RNA sequencing                                                                                                                                                                                                                                                                                                                                                                                                                                                                                                                       |
| 257 | Genetics, immunology                                                                                                                                                                                                                            | Chromosomal microarray                                                                                                                                                                                                                                                                                                                                                                                                                                                                                                                                                    |
| 258 | Dermatology, endocrinology, nutrition, occupational therapy, ophthalmology, psychiatry, physical therapy, rheumatology                                                                                                                          | Bone scan, echocardiogram, lumbar puncture, magnetic resonance imaging (brain/cervical/thoracic), positron emission tomography scan (extremities/torso), ultrasound (renal)                                                                                                                                                                                                                                                                                                                                                                                               |
| 259 | Genetics, immunology, neurology, ophthalmology                                                                                                                                                                                                  | Congenital disorders of glycosylation testing, clotting labs, complete blood count, electroencephalography, exon-level microarray, renal function tests, hematology studies, ultrasound (renal)                                                                                                                                                                                                                                                                                                                                                                           |
| 260 | Genetics, neurology, neuropsychology, ophthalmology, radiology                                                                                                                                                                                  | Electroencephalography, research labs                                                                                                                                                                                                                                                                                                                                                                                                                                                                                                                                     |
| 261 | Genetics, neurology                                                                                                                                                                                                                             | None                                                                                                                                                                                                                                                                                                                                                                                                                                                                                                                                                                      |
| 262 | Cardiology, endocrinology, genetics, neurology, pulmonology, rheumatology                                                                                                                                                                       | Electromyography, magnetic resonance imaging (brachial plexus/heart/pelvis), research labs                                                                                                                                                                                                                                                                                                                                                                                                                                                                                |
| 263 | Genetics, neurology, neuromuscular, neuropsychology                                                                                                                                                                                             | None                                                                                                                                                                                                                                                                                                                                                                                                                                                                                                                                                                      |
| 264 | Neurology, neuropsychology, ophthalmology                                                                                                                                                                                                       | Metabolomics                                                                                                                                                                                                                                                                                                                                                                                                                                                                                                                                                              |
| 265 | Dermatology, hematology, infectious disease, neurology, occupational therapy, otolaryngology, pain and palliative care, psychiatry, pulmonology, rheumatology, surgery, tracheostomy, transfusion medicine, urological surgery, vascular access | Bone marrow aspiration/biopsy, bronchoscopy, cathetergram, chest physiotherapy, chest tube placement, computed tomography scan (abdomen/ankle/cerebrum/cervical spine/chest/fibula/foot/pelvis/sinuses/tibia), echocardiogram, electrocardiogram, endoscopy, magnetic resonance angiogram (brain), magnetic resonance imaging (brain, thighs), mechanical ventilation, metabolic cart, positron emission tomography scan (torso), skin biopsy, spontaneous breathing trial, vapotherm, ultrasound (arm veins/leg veins/liver/right upper quadrant), x-ray (abdomen/chest) |
| 266 | Genetics, neurology, ophthalmology                                                                                                                                                                                                              | High resolution SNP array, metabolic labs, muscle biopsy                                                                                                                                                                                                                                                                                                                                                                                                                                                                                                                  |
| 267 | Genetics, neurology, neurology, ophthalmology                                                                                                                                                                                                   | Metabolic labs, skeletal survey                                                                                                                                                                                                                                                                                                                                                                                                                                                                                                                                           |



|     |                                                                                                                                                                                                                                   |                                                                                                                                                                                                                                                                                                                                                           |
|-----|-----------------------------------------------------------------------------------------------------------------------------------------------------------------------------------------------------------------------------------|-----------------------------------------------------------------------------------------------------------------------------------------------------------------------------------------------------------------------------------------------------------------------------------------------------------------------------------------------------------|
| 268 | Genetics, neuromuscular, neuropsychology                                                                                                                                                                                          | Magnetic resonance imaging (brain)                                                                                                                                                                                                                                                                                                                        |
| 269 | Genetics, neurology                                                                                                                                                                                                               | Magnetic resonance imaging/magnetic resonance spectroscopy (brain), magnetic resonance imaging (spine), video electroencephalography monitoring                                                                                                                                                                                                           |
| 270 | Dentistry, dermatology, endocrinology, gastroenterology, genetics, hepatology, neuropsychology, ophthalmology                                                                                                                     | Magnetic resonance imaging (brain), research labs                                                                                                                                                                                                                                                                                                         |
| 271 | Endocrinology, hematology, immunology, genetics, neurology                                                                                                                                                                        | Bone marrow biopsy, metabolic labs, endocrine studies, immunology labs, metabolomics, pancreatic function tests, skeletal survey, ultrasound (abdomen)                                                                                                                                                                                                    |
| 272 | Dermatology, genetics, pathology                                                                                                                                                                                                  | Flow cytometry, infectious disease studies                                                                                                                                                                                                                                                                                                                |
| 273 | Audiology, neuropsychology, occupational therapy, ophthalmology, physiatry, physical therapy                                                                                                                                      | Electrocardiogram, electromyography/nerve conduction velocity, lumbar puncture, magnetic resonance imaging/magnetic resonance spectroscopy (brain), ultrasound (abdomen)                                                                                                                                                                                  |
| 274 | Gastroenterology, genetics, neurology, neuromuscular                                                                                                                                                                              | Allergy testing, electroencephalography, electromyography/nerve conduction velocity, enzyme testing, magnetic resonance imaging/magnetic resonance spectroscopy (brain), metabolic labs, skin biopsy                                                                                                                                                      |
| 275 | Audiology, dentistry, endocrinology, neurodevelopment, occupational therapy, ophthalmology, physiatry, physical therapy, speech-language pathology                                                                                | Swallow study, bone age, electromyography/nerve conduction velocity, electroencephalography, ultrasound (abdomen), magnetic resonance imaging/magnetic resonance spectroscopy (brain), skeletal survey, sleep study                                                                                                                                       |
| 276 | Genetics, neurology                                                                                                                                                                                                               | None                                                                                                                                                                                                                                                                                                                                                      |
| 277 | Genetics, neuropsychology                                                                                                                                                                                                         | immunology labs, magnetic resonance imaging (spine), skeletal survey                                                                                                                                                                                                                                                                                      |
| 278 | Endocrinology, hepatology, neurology, neuropsychology, nutrition, occupational therapy, ophthalmology, physiatry, physical therapy, speech-language pathology                                                                     | Autonomic nervous system testing, swallow study, electroencephalography, electromyography/nerve conduction velocity, echocardiogram, electrocardiogram, ultrasound (abdomen), bone densitometry (femur), magnetic resonance imaging/magnetic resonance spectroscopy (brain), lumbar puncture, skeletal survey, sleep study, x-ray (skull/chest/scoliosis) |
| 279 | Genetics, pathology                                                                                                                                                                                                               | None                                                                                                                                                                                                                                                                                                                                                      |
| 280 | Genetics                                                                                                                                                                                                                          | Congenital disorders of glycosylation testing, RNA sequencing, skin biopsy                                                                                                                                                                                                                                                                                |
| 281 | Neuropsychology, ophthalmology                                                                                                                                                                                                    | Electromyography/nerve conduction velocity, bone densitometry (femur/radius/spine), magnetic resonance imaging (brain), computed tomography scan (tibia/fibula/radius/ulna/neck/humerus/heart/foot/chest/abdomen/pelvis)                                                                                                                                  |
| 282 | Neuropsychology, nutrition, occupational therapy, ophthalmology, physiatry, physical therapy, speech-language pathology                                                                                                           | Echocardiogram, electroencephalography, electromyography/nerve conduction velocity, ultrasound (abdomen)                                                                                                                                                                                                                                                  |
| 283 | Audiology, dentistry, dermatology, gastroenterology, genetics, neurodevelopment, neurology, nutrition, occupational therapy, ophthalmology, physiatry, physical therapy, rheumatology, speech-language pathology, vascular access | Echocardiogram, electrocardiogram, electromyography/nerve conduction velocity, electroencephalography, electroencephalography-evoked potential, metabolic cart                                                                                                                                                                                            |
| 284 | Neurogenetics, ophthalmology                                                                                                                                                                                                      | Magnetic resonance imaging/magnetic resonance spectroscopy                                                                                                                                                                                                                                                                                                |
| 285 | Genetics, hepatology, immunology, neuromuscular, ophthalmology, rheumatology, surgery                                                                                                                                             | Antibody testing, clotting labs, complement deficiency workup, immunology labs, rheumatology labs                                                                                                                                                                                                                                                         |
| 286 | Genetics, neurology, neuropsychology                                                                                                                                                                                              | Magnetic resonance imaging (brain), skeletal survey, targeted genetic testing                                                                                                                                                                                                                                                                             |
| 287 | Allergy and immunology, audiology, endocrinology, neuropsychology, occupational therapy, ophthalmology, physiatry, physical therapy                                                                                               | Autonomic nervous system testing, bone age, bone densitometry (radius/femur/spine/whole body), echocardiogram, electrocardiogram, electroencephalography, electromyography/nerve conduction velocity, pulmonary function tests, ultrasound (abdomen), skeletal survey, sleep study, x-ray (scoliosis)                                                     |
| 288 | Cardiology, genetics, ophthalmology                                                                                                                                                                                               | Complete blood count, chromosomal microarray, bone density, echocardiogram, congenital disorders of glycosylation testing, magnetic resonance imaging/magnetic resonance angiogram (cardiac), skin biopsy                                                                                                                                                 |
| 289 | Genetics                                                                                                                                                                                                                          | None                                                                                                                                                                                                                                                                                                                                                      |
| 290 | Neurogenetics                                                                                                                                                                                                                     | Antibody testing, congenital disorders of glycosylation testing, rheumatology labs, steroid testing                                                                                                                                                                                                                                                       |
| 291 | Genetics, neurology                                                                                                                                                                                                               | Karyotype, lumbar puncture, metabolomics, targeted genetic testing                                                                                                                                                                                                                                                                                        |

|     |                                                                                                                                                                                       |                                                                                                                                                                                                                                                                                                                                                                                                                          |
|-----|---------------------------------------------------------------------------------------------------------------------------------------------------------------------------------------|--------------------------------------------------------------------------------------------------------------------------------------------------------------------------------------------------------------------------------------------------------------------------------------------------------------------------------------------------------------------------------------------------------------------------|
| 292 | Genetics, ophthalmology                                                                                                                                                               | Skin biopsy                                                                                                                                                                                                                                                                                                                                                                                                              |
| 293 | Genetics, neurology, ophthalmology                                                                                                                                                    | None                                                                                                                                                                                                                                                                                                                                                                                                                     |
| 294 | Allergy and immunology, audiology, dermatology, genetics, rheumatology                                                                                                                | Complete blood count, metabolic labs, rheumatology labs, skin biopsy, urinalysis                                                                                                                                                                                                                                                                                                                                         |
| 295 | Genetics, neuromuscular, neuropsychology                                                                                                                                              | Creatine kinase, muscle biopsy                                                                                                                                                                                                                                                                                                                                                                                           |
| 296 | Audiology, neurodevelopment, neurology, nutrition, occupational therapy, ophthalmology, physiatry, physical therapy                                                                   | Bone age, bone densitometry (femur), echocardiogram, electroencephalography, electromyography/nerve conduction velocity, magnetic resonance imaging/magnetic resonance spectroscopy (brain), skeletal survey, swallow study, ultrasound (abdomen)                                                                                                                                                                        |
| 297 | Dermatology, genetics                                                                                                                                                                 | Metabolomics, skin biopsy, targeted genetic testing                                                                                                                                                                                                                                                                                                                                                                      |
| 298 | Dentistry, dermatology, genetics                                                                                                                                                      | Bone age, bone density, endocrine studies, skeletal survey, skin biopsy                                                                                                                                                                                                                                                                                                                                                  |
| 299 | Allergy and immunology, dentistry, dermatology, otolaryngology, rheumatology                                                                                                          | Computed tomography scan (neck), magnetic resonance imaging (neck)                                                                                                                                                                                                                                                                                                                                                       |
| 300 | Audiology, cardiology, genetics, neurodevelopment, neurology, ophthalmology, orthopedics                                                                                              | Echocardiogram, electrocardiogram, electroencephalography, magnetic resonance imaging (brain), skeletal survey, research labs                                                                                                                                                                                                                                                                                            |
| 301 | Audiology, dentistry, hematology, neuropsychology, ophthalmology                                                                                                                      | Computed tomography scan (craniofacial), echocardiogram, electrocardiogram, ultrasound (abdomen), magnetic resonance imaging/magnetic resonance spectroscopy (brain), skeletal survey, x-ray (scoliosis)                                                                                                                                                                                                                 |
| 302 | Genetics, neurology, nutrition, ophthalmology                                                                                                                                         | Enzyme testing, nutrition assessment, vitamin D                                                                                                                                                                                                                                                                                                                                                                          |
| 303 | Endocrinology, genetics, neurology, neuropsychology                                                                                                                                   | endocrine studies, magnetic resonance imaging (abdomen), metabolic labs, targeted genetic testing, thyroid function tests                                                                                                                                                                                                                                                                                                |
| 304 | Audiology, occupational therapy, ophthalmology, pain and palliative care, psychiatry, physiatry, physical therapy                                                                     | Echocardiogram, electromyography/nerve conduction velocity, pulmonary function tests, ultrasound (abdomen), magnetic resonance imaging (brain/muscle/cervical spine/thoracic spine/lumbar spine), lumbar puncture                                                                                                                                                                                                        |
| 305 | Genetics                                                                                                                                                                              | Creatine kinase, targeted genetic testing                                                                                                                                                                                                                                                                                                                                                                                |
| 306 | Audiology, dentistry, endocrinology, neurodevelopment, nutrition, occupational therapy, ophthalmology, otolaryngology, physiatry, physical therapy                                    | Swallow study, bone age, computed tomography scan (abdomen/chest/neck/pelvis), echocardiogram, electrocardiogram, electromyography/nerve conduction velocity, electroencephalography, ultrasound (abdomen/lower extremities) magnetic resonance imaging/magnetic resonance spectroscopy (brain), magnetic resonance imaging (pituitary/cervical/thoracic/elbow), skeletal survey, sleep study, x-ray (abdomen/scoliosis) |
| 307 | Audiology, dentistry, endocrinology, gastroenterology, neurodevelopment, neurology, occupational therapy, ophthalmology, otolaryngology, physiatry, physical therapy                  | Bone age, electrocardiogram, metabolic cart, ultrasound (abdomen/scrotum/testicle), skeletal survey, x-ray (chest/abdomen/kidneys/ureters/bladder)                                                                                                                                                                                                                                                                       |
| 308 | Cardiology, genetics, immunology, ophthalmology, orthopedics                                                                                                                          | Echocardiogram, electrocardiogram, research labs                                                                                                                                                                                                                                                                                                                                                                         |
| 309 | Genetics, neurology                                                                                                                                                                   | Metabolomics, RNA sequencing, skin biopsy, splicing assay                                                                                                                                                                                                                                                                                                                                                                |
| 310 | Genetics                                                                                                                                                                              | None                                                                                                                                                                                                                                                                                                                                                                                                                     |
| 311 | Allergy and immunology, dermatology, infectious disease, rheumatology                                                                                                                 | Electrocardiogram                                                                                                                                                                                                                                                                                                                                                                                                        |
| 312 | Dermatology, genetics, hematology, ophthalmology, otolaryngology, pain and palliative care, psychiatry, physiatry, physical therapy, speech-language pathology                        | Swallow study, computed tomography scan (heart), echocardiogram, electrocardiogram, magnetic resonance angiogram (brain/lower extremities), pulmonary function tests, magnetic resonance imaging (thighs), skeletal survey, x-ray (scoliosis)                                                                                                                                                                            |
| 313 | Audiology, gastroenterology, hematology, neurodevelopment, nutrition, ophthalmology, speech-language pathology                                                                        | Echocardiogram, electrocardiogram, electroencephalography, ultrasound (abdomen), magnetic resonance imaging (abdomen), computed tomography scan (cerebrum), skeletal survey, sleep study, x-ray (scoliosis)                                                                                                                                                                                                              |
| 314 | Internal medicine                                                                                                                                                                     | Cytokine profiling, metabolomics, skin biopsy                                                                                                                                                                                                                                                                                                                                                                            |
| 315 | Genetics, neurodevelopment                                                                                                                                                            | Research labs                                                                                                                                                                                                                                                                                                                                                                                                            |
| 316 | Allergy and immunology, audiology, dentistry, endocrinology, neurodevelopment, neurology, occupational therapy, ophthalmology, physiatry, physical therapy, speech-language pathology | Autonomic nervous system testing, echocardiogram, electrocardiogram, electromyography/nerve conduction velocity, metabolic cart, ultrasound (abdomen), skeletal survey, x-ray (scoliosis)                                                                                                                                                                                                                                |

|     |                                                                                                                                                                            |                                                                                                                                                                                                                                                                                                         |
|-----|----------------------------------------------------------------------------------------------------------------------------------------------------------------------------|---------------------------------------------------------------------------------------------------------------------------------------------------------------------------------------------------------------------------------------------------------------------------------------------------------|
| 317 | Genetics, neurology, ophthalmology                                                                                                                                         | Congenital disorders of glycosylation testing, echocardiogram                                                                                                                                                                                                                                           |
| 318 | Cardiology, dermatology, gastroenterology, genetics, immunology, neurology, ophthalmology                                                                                  | Antibody testing, echocardiogram, electrocardiogram, immunology labs, infectious disease studies                                                                                                                                                                                                        |
| 319 | Dentistry, genetics, neurology, neuropsychology                                                                                                                            | Computed tomography scan (craniofacial), echocardiogram, electrocardiogram, electroencephalography, magnetic resonance imaging/magnetic resonance spectroscopy (brain), sleep study, x-ray (wrist/hands/spine)                                                                                          |
| 320 | Rheumatology                                                                                                                                                               | Bone marrow aspiration/biopsy, bone scan, computed tomography scan (chest), magnetic resonance imaging (brain/humerus/pelvis), positron emission tomography scan (extremities/torso), pulmonary function tests                                                                                          |
| 321 | Genetics, neuroendocrinology                                                                                                                                               | Endocrine studies                                                                                                                                                                                                                                                                                       |
| 322 | Occupational therapy, psychiatry, physical therapy                                                                                                                         | Electromyography/nerve conduction velocity, magnetic resonance imaging (cervical spine/thoracic spine/lumbar spine), magnetic resonance imaging/magnetic resonance spectroscopy (brain), ultrasound (abdomen), lumbar puncture                                                                          |
| 323 | Audiology, genetics, hematology, ophthalmology                                                                                                                             | Swallow study, computed tomography scan (cerebrum), echocardiogram, electrocardiogram, electromyography/nerve conduction velocity, ultrasound (abdomen), magnetic resonance imaging/magnetic resonance spectroscopy (brain)                                                                             |
| 324 | Neurogenetics                                                                                                                                                              | Exon-level microarray, metabolic labs, metabolomics                                                                                                                                                                                                                                                     |
| 325 | Genetics                                                                                                                                                                   | Research labs                                                                                                                                                                                                                                                                                           |
| 326 | Genetics, infectious disease, internal medicine, neurology, ophthalmology, pathology, pulmonology                                                                          | Antibody testing, computed tomography scan (chest), infectious disease studies, magnetic resonance imaging (brain/spine), positron emission tomography/computed tomography scan, viral tests                                                                                                            |
| 327 | Genetics, neuromuscular, neuropsychology                                                                                                                                   | Magnetic resonance imaging (full body)                                                                                                                                                                                                                                                                  |
| 328 | Audiology, ophthalmology, otolaryngology                                                                                                                                   | Electromyography/nerve conduction velocity, electrocardiogram, magnetic resonance imaging (brain/cervical spine/lumbar spine/thoracic spine/posterior fossa/internal acoustic canal/hip), lumbar puncture, x-ray (hip/knee)                                                                             |
| 329 | Cardiology, genetics, neurology, neuropsychology                                                                                                                           | Magnetic resonance imaging (brain)                                                                                                                                                                                                                                                                      |
| 330 | Cardiology, genetics, ophthalmology                                                                                                                                        | Congenital disorders of glycosylation testing, echocardiogram, electrocardiogram, skeletal survey                                                                                                                                                                                                       |
| 331 | Audiology, dentistry, neuropsychology, ophthalmology                                                                                                                       | Computed tomography scan (craniofacial), echocardiogram, electrocardiogram, electroencephalography, electroencephalography-evoked potential, electromyography/nerve conduction velocity, pulmonary function tests, ultrasound (abdomen), skeletal survey, sleep study, swallow study, x-ray (scoliosis) |
| 332 | Genetics                                                                                                                                                                   | Skin biopsy                                                                                                                                                                                                                                                                                             |
| 333 | Allergy and immunology, audiology, dermatology, nephrology, neurodevelopment, occupational therapy, ophthalmology, psychiatry, physical therapy, speech-language pathology | Bone age, computed tomography scan (chest), echocardiogram, electrocardiogram, electromyography/nerve conduction velocity, magnetic resonance imaging/magnetic resonance spectroscopy (brain), swallow study, ultrasound (abdomen/renal/thyroid)                                                        |
| 334 | Audiology, genetics, neurodevelopment, neurology, ophthalmology                                                                                                            | Research labs                                                                                                                                                                                                                                                                                           |
| 335 | Allergy and immunology, audiology, neurodevelopment, neurology, nutrition, ophthalmology, psychiatry, physical therapy, occupational therapy                               | Bone age, echocardiogram, electrocardiogram, electroencephalography, electromyography/nerve conduction velocity, magnetic resonance imaging/magnetic resonance spectroscopy (brain), skeletal survey, swallow study, ultrasound (abdomen), x-ray (chest)                                                |
| 336 | Neurogenetics, neuropsychology, ophthalmology                                                                                                                              | Sleep study                                                                                                                                                                                                                                                                                             |
| 337 | Allergy and immunology, genetics, neurology, ophthalmology, pulmonology, rheumatology                                                                                      | Autonomic nervous system testing, computed tomography scan (chest), electrocardiogram, electroencephalography, electromyography/nerve conduction velocity, magnetic resonance imaging (brain), skeletal survey                                                                                          |
| 338 | Audiology, cardiology, endocrinology, gastroenterology, genetics, neurodevelopment, neurology, ophthalmology, orthopedics                                                  | Echocardiogram, electrocardiogram, research labs, ultrasound (liver)                                                                                                                                                                                                                                    |
| 339 | Genetics, neuropsychology, ophthalmology                                                                                                                                   | Echocardiogram, endocrine studies, magnetic resonance imaging (brain), ultrasound (abdomen)                                                                                                                                                                                                             |

|     |                                                                                                                                                |                                                                                                                                                                                                                                                                                                                                   |
|-----|------------------------------------------------------------------------------------------------------------------------------------------------|-----------------------------------------------------------------------------------------------------------------------------------------------------------------------------------------------------------------------------------------------------------------------------------------------------------------------------------|
| 340 | Allergy and immunology, occupational therapy, ophthalmology, pain and palliative care, psychiatry, physical therapy, speech-language pathology | Swallow study, echocardiogram, electromyography/nerve conduction velocity, electroencephalography-evoked potential, lumbar puncture, magnetic resonance imaging (brain/cervical/thoracic), ultrasound (abdomen), pulmonary function tests                                                                                         |
| 341 | Dentistry, genetics, neurology, neuropsychology                                                                                                | Bone density, metabolic labs                                                                                                                                                                                                                                                                                                      |
| 342 | Occupational therapy, ophthalmology, psychiatry, physical therapy, speech-language pathology                                                   | Swallow study, echocardiogram, electroencephalography, electroencephalography-evoked potential, electromyography/nerve conduction velocity, lumbar puncture, magnetic resonance imaging (cervical/thoracic), magnetic resonance imaging/magnetic resonance spectroscopy (brain), pulmonary function tests                         |
| 343 | Dentistry, dermatology, endocrinology, immunology, pulmonology                                                                                 | Computed tomography scan (chest), flow cytometry, pulmonary function tests, skin biopsy, targeted genetic testing                                                                                                                                                                                                                 |
| 344 | Genetics, neuroimmunology, rheumatology                                                                                                        | Targeted genetic testing                                                                                                                                                                                                                                                                                                          |
| 345 | Endocrinology, gastroenterology, genetics, neurology - sleep disorders, neuromuscular, nutrition, ophthalmology                                | Bone age, hearing test, lumbar puncture, metabolic labs, magnetic resonance imaging/magnetic resonance spectroscopy, skeletal survey                                                                                                                                                                                              |
| 346 | Audiology, neurodevelopment, neurology, psychiatry, rheumatology                                                                               | Audiology testing, swallow study, bone densitometry, echocardiogram, electrocardiogram, electromyography, lumbar puncture, nerve conduction velocity, skeletal survey, skin biopsy, sleep study, sweat chloride test                                                                                                              |
| 347 | Endocrinology, genetics, neurology, ophthalmology, orthopedics                                                                                 | Complete blood count, electrolytes, endocrine studies, liver function tests, sleep study, thyroid labs                                                                                                                                                                                                                            |
| 348 | Genetics, neurogenetics, neurology, ophthalmology                                                                                              | Magnetic resonance imaging/magnetic resonance spectroscopy (brain), magnetic resonance imaging (spine), video electroencephalography monitoring                                                                                                                                                                                   |
| 349 | Genetics, immunology, neurology, pain and palliative care, rheumatology                                                                        | Bone density, immunology labs, lumbar puncture, rheumatology labs                                                                                                                                                                                                                                                                 |
| 350 | Audiology, genetics, neurology, speech-language pathology                                                                                      | Electroencephalography, feeding study, magnetic resonance imaging (brain), research labs                                                                                                                                                                                                                                          |
| 351 | Endocrinology, genetics, ophthalmology, neuropsychology                                                                                        | Bone age, functional magnetic resonance imaging, ultrasound (renal)                                                                                                                                                                                                                                                               |
| 352 | Dermatology, gastroenterology, genetics, neurodevelopment, neurology, orthopedics                                                              | Endocrine studies, magnetic resonance imaging (brain), research labs, skeletal survey                                                                                                                                                                                                                                             |
| 353 | Endocrinology, neurodevelopment, neurology, nutrition                                                                                          | Computed tomography scan (cerebrum), electroencephalography, electromyography/nerve conduction velocity, lumbar puncture, skeletal survey, skin biopsy, sleep study, ultrasound (abdomen)                                                                                                                                         |
| 354 | Audiology, genetics, neurology, ophthalmology                                                                                                  | Audiology testing, echocardiogram, magnetic resonance imaging, metabolic labs, mitochondrial studies, muscle biopsy, RNA sequencing, skeletal survey, ultrasound (abdominal)                                                                                                                                                      |
| 355 | Gastroenterology, genetics, hematology                                                                                                         | Autonomic nervous system testing, bone densitometry (femur/radius/spine), computed tomography scan (cerebrum/chest/abdomen/pelvis/femur/foot/humerus/cervical spine/radius/ulna/tibia/fibula), echocardiogram, electrocardiogram, electromyography/nerve conduction velocity, lumbar puncture, magnetic resonance imaging (brain) |
| 356 | Gastroenterology, neuropsychology, psychiatry                                                                                                  | Echocardiogram, electromyography, magnetic resonance imaging (brain), swallow study, skin biopsy, ultrasound (abdomen), x-ray (chest)                                                                                                                                                                                             |
| 357 | Endocrinology, genetics, neurology, neuromuscular, ophthalmology                                                                               | Audiology testing, autonomic nervous system testing, electromyography/nerve conduction velocity, magnetic resonance imaging, mitochondrial studies, muscle biopsy                                                                                                                                                                 |
| 358 | Infectious disease, rheumatology                                                                                                               | Cytokine profiling, metabolomics, skin biopsy                                                                                                                                                                                                                                                                                     |
| 359 | Audiology, genetics, neurodevelopment, neurology, ophthalmology, physical therapy, speech-language pathology                                   | Lumbar puncture, metabolic labs, research labs                                                                                                                                                                                                                                                                                    |
| 360 | Gastroenterology, genetics, immunology, metabolism                                                                                             | Fasting study, metabolic labs                                                                                                                                                                                                                                                                                                     |
| 361 | Audiology, gastroenterology, genetics, neurodevelopment, neurology, ophthalmology, otolaryngology                                              | Lumbar puncture, research labs                                                                                                                                                                                                                                                                                                    |
| 362 | Genetics                                                                                                                                       | None                                                                                                                                                                                                                                                                                                                              |

|     |                                                                                 |                                                                                                                                                     |
|-----|---------------------------------------------------------------------------------|-----------------------------------------------------------------------------------------------------------------------------------------------------|
| 363 | Endocrinology, neurology, neuropsychology, nutrition, physiatry, psychiatry     | Glucose tolerance test, electrocardiogram, lumbar puncture, magnetic resonance imaging (brain/pituitary), skeletal survey, skin biopsy, sleep study |
| 364 | Cardiology, genetics, neurology, ophthalmology, pediatrics                      | Electrocardiogram, electroencephalography, metabolomics, metabolic labs, mitochondrial studies, skeletal survey                                     |
| 365 | Ophthalmology, rehabilitation consult, social work                              | Electromyography/nerve conduction velocity, lumbar puncture, magnetic resonance imaging (brain), skin biopsy, swallow study, ultrasound (abdomen)   |
| 366 | Genetics                                                                        | Echocardiogram                                                                                                                                      |
| 367 | Genetics                                                                        | Metabolomics                                                                                                                                        |
| 368 | Genetics                                                                        | Research labs                                                                                                                                       |
| 369 | Gastroenterology, neuropsychology                                               | Magnetic resonance imaging (brain/cervical spine), electromyography/nerve conduction velocity, lumbar puncture                                      |
| 370 | Cardiology, gastroenterology, genetics, metabolism, neurosurgery, ophthalmology | Echocardiogram, electromyography, exon-level microarray, metabolic labs, metabolomics, targeted genetic testing, thyroid function tests             |
| 371 | Genetics, neuromuscular                                                         | Hematology studies, pulmonary function tests, x-ray                                                                                                 |
| 372 | Genetics, ophthalmology                                                         | Skin biopsy                                                                                                                                         |
| 373 | Neuromuscular, ophthalmology                                                    | Echocardiogram, electromyography/nerve conduction velocity, magnetic resonance imaging (lower extremities), pulmonary function tests, swallow study |
| 374 | Genetics, ophthalmology                                                         | Metabolic labs, targeted genetic testing, urinalysis                                                                                                |
| 375 | Neurogenetics                                                                   | Chromosomal microarray, echocardiogram, electrocardiogram, magnetic resonance imaging                                                               |
| 376 | Audiology, genetics, neurology, ophthalmology                                   | Research labs                                                                                                                                       |
| 377 | Allergy and immunology, dermatology, genetics                                   | Karyotype, chromosomal microarray, immunology labs, skin biopsy, targeted genetic testing                                                           |
| 378 | Cardiology, genetics, neurology, ophthalmology                                  | Environmental exposure tests                                                                                                                        |
| 379 | Audiology, genetics, neurodevelopment, neurology                                | Lumbar puncture                                                                                                                                     |
| 380 | Genetics, neurology, ophthalmology                                              | Magnetic resonance imaging/magnetic resonance spectroscopy (brain), electromyography, targeted genetic testing                                      |
| 381 | Genetics, neuromuscular, neuropsychology, physical therapy, pulmonology         | Electromyography/nerve conduction velocity, mitochondrial studies, muscle biopsy, pulmonary function tests                                          |
| 382 | Genetics                                                                        | Complete blood count, creatine phosphokinase, magnetic resonance imaging, metabolic labs, hematology studies                                        |

**Table S4. Applicant demographic characteristics and primary symptom category**

|                                                  | <b>Total applicants<sup>[1]</sup><br/>(n= 1519)</b> | <b>Pediatric applicants<br/>(n= 615)</b> | <b>Pediatric applicants accepted<br/>(n= 350)</b> | <b>Adult applicants<br/>(n= 904)</b> | <b>Adult applicants accepted<br/>(n= 251)</b> | <b>Significance</b> |
|--------------------------------------------------|-----------------------------------------------------|------------------------------------------|---------------------------------------------------|--------------------------------------|-----------------------------------------------|---------------------|
| <b>Sex</b>                                       |                                                     |                                          |                                                   |                                      |                                               |                     |
| Males, n (%)                                     | 704 (46.3)                                          | 318 (51.7)                               | 170 (48.6)                                        | 386 (42.7)                           | 109 (43.4)                                    | #                   |
| Females, n (%)                                   | 811 (53.4)                                          | 297 (48.3)                               | 180 (51.4)                                        | 514 (56.9)                           | 141 (56.2)                                    | #                   |
| Other, n (%)                                     | 4 (0.3)                                             | 0 (0.0)                                  | 0 (0.0)                                           | 4 (0.4)                              | 1 (0.4)                                       |                     |
| <b>Age (Years) <sup>a</sup></b>                  | 29 +/- 22                                           | 8 +/- 5                                  | 8 +/- 5                                           | 43 +/- 16                            | 39 +/- 16                                     |                     |
| <b>Race</b>                                      |                                                     |                                          |                                                   |                                      |                                               |                     |
| White, n (%)                                     | 1178 (77.6)                                         | 452 (73.5)                               | 259 (74.0)                                        | 726 (80.3)                           | 197 (78.5)                                    | #                   |
| Asian, n (%)                                     | 82 (5.4)                                            | 41 (6.7)                                 | 24 (6.9)                                          | 41 (4.5)                             | 14 (5.6)                                      |                     |
| Black or African American, n (%)                 | 73 (4.8)                                            | 28 (4.6)                                 | 18 (5.1)                                          | 45 (5.0)                             | 13 (5.2)                                      |                     |
| Multiracial, n (%)                               | 65 (4.3)                                            | 34 (5.5)                                 | 16 (4.6)                                          | 31 (3.4)                             | 7 (2.8)                                       |                     |
| American Indian or Alaska Native, n (%)          | 3 (0.2)                                             | 1 (0.2)                                  | 0 (0.0)                                           | 2 (0.2)                              | 0 (0.0)                                       |                     |
| Native Hawaiian or Other Pacific Islander, n (%) | 1 (0.1)                                             | 1 (0.2)                                  | 1 (0.3)                                           | 0 (0.0)                              | 0 (0.0)                                       |                     |
| Other, n (%)                                     | 117 (7.7)                                           | 58 (9.4)                                 | 32 (9.1)                                          | 59 (6.5)                             | 20 (8.0)                                      |                     |
| <b>Ethnicity</b>                                 |                                                     |                                          |                                                   |                                      |                                               |                     |
| Hispanic or Latino                               | 156 (10.3)                                          | 110 (17.9)                               | 64 (18.3)                                         | 46 (5.1)                             | 19 (7.6)                                      | #                   |
| Not Hispanic or Latino                           | 1133 (74.6)                                         | 424 (68.9)                               | 237 (67.7)                                        | 709 (78.4)                           | 185 (73.7)                                    | #                   |
| Unknown/Not Reported                             | 230 (15.1)                                          | 81 (13.2)                                | 49 (14.0)                                         | 149 (16.5)                           | 47 (18.7)                                     |                     |

| <b>Primary symptom category</b>                     |            |            |            |            |            |    |
|-----------------------------------------------------|------------|------------|------------|------------|------------|----|
| Neurology, n (%)                                    | 607 (40.0) | 285 (46.3) | 171 (48.9) | 322 (35.6) | 112 (44.6) | ^# |
| Musculoskeletal and orthopedics, n (%)              | 148 (9.7)  | 63 (10.2)  | 43 (12.3)  | 85 (9.4)   | 25 (10.0)  |    |
| Allergies and disorders of the immune system, n (%) | 104 (6.8)  | 28 (4.6)   | 15 (4.3)   | 76 (8.4)   | 17 (6.8)   | #  |
| Gastroenterology, n (%)                             | 99 (6.5)   | 38 (6.2)   | 15 (4.3)   | 61 (6.7)   | 7 (2.8)    |    |
| Rheumatology, n (%)                                 | 86 (5.7)   | 12 (2.0)   | 10 (2.9)   | 74 (8.2)   | 18 (7.2)   | #  |
| Cardiology and vascular conditions, n (%)           | 52 (3.4)   | 21 (3.4)   | 12 (3.4)   | 31 (3.4)   | 13 (5.2)   |    |
| Endocrinology, n (%)                                | 43 (2.8)   | 17 (2.8)   | 11 (3.1)   | 26 (2.9)   | 5 (2.0)    |    |
| Pulmonology, n (%)                                  | 31 (2.0)   | 11 (1.8)   | 3 (0.9)    | 20 (2.2)   | 6 (2.4)    |    |
| Hematology, n (%)                                   | 26 (1.7)   | 8 (1.3)    | 3 (0.9)    | 18 (2.0)   | 6 (2.4)    |    |
| Infectious diseases, n (%)                          | 20 (1.3)   | 1 (0.2)    | 0 (0.0)    | 19 (2.1)   | 1 (0.4)    | #  |
| Dermatology, n (%)                                  | 16 (1.1)   | 2 (0.3)    | 1 (0.3)    | 14 (1.5)   | 4 (1.6)    |    |
| Nephrology, n (%)                                   | 15 (1.0)   | 6 (1.0)    | 4 (1.1)    | 9 (1.0)    | 5 (2.0)    |    |
| Oncology, n (%)                                     | 11 (0.7)   | 4 (0.7)    | 1 (0.3)    | 7 (0.8)    | 1 (0.4)    |    |
| Dentistry and craniofacial, n (%)                   | 9 (0.6)    | 4 (0.7)    | 2 (0.6)    | 5 (0.6)    | 1 (0.4)    |    |
| Ophthalmology, n (%)                                | 8 (0.5)    | 3 (0.5)    | 2 (0.6)    | 5 (0.6)    | 3 (1.2)    |    |

|                                              |            |            |           |            |           |  |
|----------------------------------------------|------------|------------|-----------|------------|-----------|--|
| Psychiatry, n (%)                            | 5 (0.3)    | 2 (0.3)    | 1 (0.3)   | 3 (0.3)    | 1 (0.4)   |  |
| Toxicology and environmental medicine, n (%) | 3 (0.2)    | 0 (0.0)    | 0 (0.0)   | 3 (0.3)    | 0 (0.0)   |  |
| Urology, n (%)                               | 3 (0.2)    | 1 (0.2)    | 1 (0.3)   | 2 (0.2)    | 0 (0.0)   |  |
| Gynecology and reproductive medicine, n (%)  | 2 (0.1)    | 1 (0.2)    | 1 (0.3)   | 1 (0.1)    | 0 (0.0)   |  |
| Other, n (%)                                 | 231 (15.2) | 108 (17.6) | 54 (15.4) | 123 (13.6) | 26 (10.4) |  |

<sup>a</sup>The mean age +/- standard deviation (in years) is indicated.

<sup>[1]</sup> The number of applications reviewed or withdrawn by May 23, 2017 totaled 1203. At that time, 316 applications were still under review by the clinical sites.

Characteristics of those who applied and those who were accepted into the Undiagnosed Diseases Network since its inception. Percentages shown in parentheses. P values <0.01 for comparisons (Fisher's exact test) \* pediatric applicants vs pediatric accepted; ^adult applicants vs adult accepted; # adult applicants vs pediatric applicants



## **Contributions**

The entire network contributed to the results presented here. EA, KS & CE analyzed the data. EA wrote and revised the draft with help from co-authors.

## Members of the Undiagnosed Diseases Network

David R. Adams, Mercedes E. Alejandro, Patrick Allard, Euan A. Ashley, Mahshid S. Azamian, Carlos A. Bacino, Ashok Balasubramanyam, Hayk Barseghyan, Gabriel F. Batzli, Alan H. Beggs, Hugo J. Bellen, Jonathan A. Bernstein, Anna Bican, David P. Bick, Camille L. Birch, Devon Bonner, Braden E. Boone, Bret L. Bostwick, Lauren C. Briere, Donna M. Brown, Matthew Brush, Elizabeth A. Burke, Lindsay C. Burrage, Shan Chen, Gary D. Clark, Terra R. Coakley, Joy D. Cogan, Cynthia M. Cooper, Heidi Cope, William J. Craigen, Precilla D'Souza, Mariska Davids, Jean M. Davidson, Jyoti G. Dayal, Esteban C. Dell'Angelica, Shweta U. Dhar, Ani Dillon, Katrina M. Dipple, Laurel A. Donnell-Fink, Naghmeh Dorrani, Daniel C. Dorset, Emilie D. Douine, David D. Draper, Annika M. Dries, David J. Eckstein, Lisa T. Emrick, Christine M. Eng, Gregory M. Enns, Ascia Eskin, Cecilia Esteves, Tyra Estwick, Liliana Fernandez, Paul G. Fisher, Brent L. Fogel, Noah D. Friedman, William A. Gahl, Emily Glanton, Rena A. Godfrey, David B. Goldstein, Sarah E. Gould, Jean-Philippe F. Gourdine, Catherine A. Groden, Andrea L. Gropman, Melissa Haendel, Rizwan Hamid, Neil A. Hanchard, Lori H. Handley, Matthew R. Herzog, Ingrid A. Holm, Jason Hom, Ellen M. Howerton, Howard J. Jacob, Mahim Jain, Yong-hui Jiang, Jean M. Johnston, Angela L. Jones, David M. Koeller, Isaac S. Kohane, Jennefer N. Kohler, Donna M. Krasnewich, Elizabeth L. Krieg, Joel B. Krier, Jennifer E. Kyle, Seema R. Lalani, C. Christopher Lau, Jozef Lazar, Brendan H. Lee, Hane Lee, Shawn E. Levy, Richard A. Lewis, Sharyn A. Lincoln, Allen Lipson, Sandra K. Loo, Joseph Loscalzo, Richard L. Maas, Ellen F. Macnamara, Calum A. MacRae, Valerie V. Maduro, Marta M. Majcherska, May Christine V. Malicdan, Laura A. Mamounas, Teri A. Manolio, Thomas C. Markello, Ronit Marom, Julian A. Martínez-Agosto, Shruti Marwaha, Thomas May, Allyn McConkie-Rosell, Colleen E. McCormack, Alexa T. McCray, Jason D. Merker, Thomas O. Metz, Matthew Might, Paolo M. Moretti, John J. Mulvihill, Jennifer L. Murphy, Donna M. Muzny, Michele E. Nehrebecky, Stan F. Nelson, J. Scott Newberry, John H. Newman, Sarah K. Nicholas, Donna Novacic, Jordan S. Orange, J. Carl Pallais, Christina GS. Palmer, Jeanette C. Papp, Neil H. Parker, Loren DM. Pena, John A. Phillips III, Jennifer E. Posey, John H. Postlethwait, Lorraine Potocki, Barbara N. Pusey, Chloe M. Reuter, Amy K. Robertson, Lance H. Rodan, Jill A. Rosenfeld, Jacinda B. Sampson, Susan L. Samson, Kelly Schoch, Molly C. Schroeder, Daryl A. Scott, Prashant Sharma, Vandana Shashi, Edwin K. Silverman, Janet S. Sinsheimer, Kevin S. Smith, Ariane G. Soldatos, Rebecca C. Spillmann, Kimberly Splinter, Joan M. Stoler, Nicholas Stong, Jennifer A. Sullivan, David A. Sweetser, Cynthia J. Tiff, Camilo Toro, Alyssa A. Tran, Tiina K. Urv, Zaheer M. Valivullah, Eric Vilain, Tiphonie P. Vogel, Daryl M. Waggott, Colleen E. Wahl, Nicole M. Walley, Chris A. Walsh, Michael F. Wangler, Patricia A. Ward, Katrina M. Waters, Bobbie-Jo M. Webb-Robertson, Monte Westerfield, Matthew T. Wheeler, Anastasia L. Wise, Lynne A. Wolfe, Elizabeth A. Worthey, Shinya Yamamoto, Yaping Yang, Guoyun Yu, Diane B. Zastrow, Chunli Zhao, Allison Zheng
